# Supplementary material for: Multiplex Detection of 24 Staphylococcal Enterotoxins in Culture Supernatant Using Liquid Chromatography Coupled to High-Resolution Mass Spectrometry
Source: MDPI journal article supplement (doi:10.3390/toxins14040249), 2022-03-31
Supplement: s1 [file s1]

# Supplementary Materials: Multiplex detection of 24 staphylococcal enterotoxins in culture supernatant using Liquid Chromatography coupled to High Resolution Mass Spectrometry.

Donatien Lefebvre, Kevin Blanco-Valle, Jacques-Antoine Hennekinne, Stéphanie Simon, François Fenaille, François Becher and Yacine Nia

Table S1. Origin of *Staphylococcus aureus* strains.

| Strain       | Accession no.  | sample origin              | Bacteria count (cfu/g) | Related publication | SE detected in food (official method) | Date of isolation | Geographical location | Strain origin       |
|--------------|----------------|----------------------------|------------------------|---------------------|---------------------------------------|-------------------|-----------------------|---------------------|
| 05CEB51      |                | Rice                       | NA <sup>(1)</sup>      | /                   | NA                                    | 2005              | France                | SFPO <sup>(2)</sup> |
| 05CEB52      | ERS4338<br>875 | Human                      | NA                     | Merda et al, 2020   | NA                                    | 2005              | France                | SFPO                |
| 05CEB53      |                | Human                      | NA                     | /                   | NA                                    | 2005              | France                | SFPO                |
| 06CEB196     |                | Coconut beads              | NA                     | /                   | Vidas: positive                       | 2006              | France                | SFPO                |
| 06CEB83      |                | Cheese                     | NA                     | /                   | Vidas: positive                       | 2006              | France                | Own Check           |
| 08CEB393     |                | Wrap salmon                | NA                     | /                   | Vidas: positive                       | 2008              | France                | SFPO                |
| 08CEB402     |                | Blood sausage              | NA                     | /                   | Vidas: positive                       | 2008              | France                | SFPO                |
| 09CEB231     |                | Fruit tart on pastry cream | NA                     | /                   | Vidas: positive                       | 2009              | France                | SFPO                |
| 09CEB303     | ERS4338<br>887 | unknown                    | NA                     | Merda et al, 2020   | NA                                    | 1997              | Japan                 | SFPO                |
| 09CEB314     | ERS4338<br>888 | Cheese                     | NA                     | Merda et al, 2020   | Vidas: positive                       | 2009              | France                | SFPO                |
| 10CEB282     |                | Steak                      | NA                     | /                   | Vidas: positive                       | 2010              | France                | SFPO                |
| 10CEB401     |                | Chicken                    | NA                     | /                   | Vidas: positive                       | 2010              | France                | SFPO                |
| 11CEB110     |                | Merguez                    | NA                     | /                   | Vidas: positive                       | 2011              | France                | SFPO                |
| 12CEB137     |                | Sheep's cheese             | NA                     | /                   | Vidas: positive                       | 2012              | France                | SFPO                |
| 12CEB368     |                | Semi-cooked foie gras      | NA                     | /                   | Vidas: positive                       | 2012              | France                | SFPO                |
| 12CEB496     |                | Chicken Sandwich           | NA                     | /                   | Vidas: positive                       | 2012              | France                | SFPO                |
| 12CEB512     |                | Cottage cheese             | NA                     | /                   | Ridascreen: negative                  | 2012              | France                | SFPO                |
| 13CEB193     | ERS4338<br>917 | Matured cheese             | NA                     | Merda et al, 2020   | Vidas: positive                       | 2013              | France                | SFPO                |
| 13CEB437     |                | Sausage Sandwich           | NA                     | /                   | Ridascreen: negative                  | 2013              | France                | SFPO                |
| 14A / FRI361 | ERS4338<br>950 | Meat                       | NA                     | Merda et al, 2020   | NA                                    | 1962              | United Kingdom        | Reference Strain    |
| 14SBCL1004   |                | Ham                        | NA                     | /                   | Vidas: positive                       | 2014              | France                | SFPO                |
| 14SBCL770    |                | Pork stir-fry              | NA                     | /                   | Ridascreen: negative                  | 2014              | France                | SFPO                |

| Strain            | Accession no.  | sample origin           | Bacteria count (cfu/g) | Related publication     | SE detected in food (official method)      | Date of isolation | Geographical location | Strain origin    |
|-------------------|----------------|-------------------------|------------------------|-------------------------|--------------------------------------------|-------------------|-----------------------|------------------|
| 15SBCL115<br>1    |                | Cream puff              | 1.80E+08               | /                       | Vidas: positive                            | 2015              | France                | SFPO             |
| 15SBCL142<br>8    | ERS4338<br>968 | Cheese                  | 6.40E+05               | Merda et al,<br>2020    | NA                                         | 2015              | France                | SFPO             |
| 15SBCL143<br>8    | ERS4338<br>971 | Cheese                  | 1.00E+06               | Merda et al,<br>2020    | NA                                         | 2015              | France                | SFPO             |
| 15SBCL452         |                | Paëlla                  | 1.60E+06               | /                       | Vidas: positive                            | 2015              | France                | SFPO             |
| 16SBCL102<br>8    |                | Coriander Turkey        | 1.60E+03               | /                       | No food sample                             | 2016              | France                | SFPO             |
| 16SBCL120<br>4    |                | Chicken - rice          | 1.00E+04               | /                       | Ridascreen:<br>negative                    | 2016              | France                | SFPO             |
| 16SBCL136<br>8    |                | Beef Bourguignon        | 10-100                 | /                       | No food sample                             | 2016              | France                | SFPO             |
| 16SBCL246         |                | Marinated salmon        | 1.10E+03               | /                       | NA                                         | 2016              | France                | SFPO             |
| 16SBCL259         |                | Kitchen tool            | NA                     | /                       | No food sample                             | 2016              | France                | SFPO             |
| 16SBCL899         |                | Semolina couscous       | NP                     | /                       | Vidas: positive                            | 2016              | France                | SFPO             |
| 17SBCL25          |                | Chicken                 | 3.30E+05               | /                       | Vidas: negative<br>Ridascreen:<br>negative | 2017              | France                | SFPO             |
| 17SBCL330         |                | vegetable               | No food sample         | /                       | NA                                         | 2017              | France                | SFPO             |
| 17SBCL693         |                | Cream cake              | 1.50E+08               | /                       | Vidas: positive                            | 2017              | France                | SFPO             |
| 18SBCL601         |                | Paella with meat        | 1.10E+09               | /                       | Vidas: positive                            | 2018              | France                | SFPO             |
| 18SBCL855         |                | sandwich                | < 400                  | /                       | Vidas: negative                            | 2018              | France                | SFPO             |
| 19SBCL105<br>9    |                | Raw milk                | 1.00E+07               | /                       | Vidas: positive                            | 2019              | France                | Own Check        |
| 19SBCL591         |                | Ham                     | 1.40E+08               | /                       | Vidas : positive                           | 2019              | France                | SFPO             |
| 20SBCL08          |                | Raw milk cheese         | 1.00E+06               | /                       | Vidas : positive                           | 2020              | France                | Own Check        |
| 337E              |                | Pasteurized milk cheese | NA                     | Letertre et al<br>2003b | NA                                         | unknown           | unknown               | SFPO             |
| 349E              |                | ribs                    | NA                     | Letertre et al<br>2003a | NA                                         | unknown           | unknown               | SFPO             |
| 352E              |                | fresh cheese            | NA                     | Letertre et al<br>2003a | NA                                         | unknown           | unknown               | SFPO             |
| 356E              |                | cheese                  | NA                     | Letertre et al<br>2003a | NA                                         | unknown           | unknown               | SFPO             |
| 42A /<br>FRIS6    | ERS4339<br>010 | unknown                 | NA                     | Merda et al,<br>2020    | NA                                         | 2001              | unknown               | Reference Strain |
| 43A /<br>FRI137   | ERS4339<br>011 | Human                   | NA                     | Merda et al,<br>2020    | NA                                         | 2001              | unknown               | Reference Strain |
| 44A /<br>FRI1230  | ERS4339<br>012 | Breast milk             | NA                     | Merda et al,<br>2020    | NA                                         | 2001              | unknown               | Reference Strain |
| 45A /<br>FRI1151M | ERS4339<br>013 | unknown                 | NA                     | Merda et al,<br>2020    | NA                                         | 2001              | unknown               | Reference Strain |

| Strain       | Accession no. | sample origin      | Bacteria count (cfu/g) | Related publication | SE detected in food (official method) | Date of isolation | Geographical location | Strain origin    |
|--------------|---------------|--------------------|------------------------|---------------------|---------------------------------------|-------------------|-----------------------|------------------|
| 46A / FRI326 | ERS4339014    | Chicken tetrazzini | NA                     | Merda et al, 2020   | NA                                    | 2001              | unknown               | Reference Strain |

NA: Not available. SFPO: Staphylococcal food poisoning outbreaks

**Table S2.** Peptides database of 24 SEs.

| Toxin | Peptide                         | m/z       | z  | RT (min) | EC % | Fragment s                                             | Variant present | Variant absent | Commun SE          | Peptide ratio | CV% ratio | Specific peptide | Heavy peptide |
|-------|---------------------------------|-----------|----|----------|------|--------------------------------------------------------|-----------------|----------------|--------------------|---------------|-----------|------------------|---------------|
| SEA   | GLIVFHTSTEPSVNYDLFGA QGQYSNTLLR | 1109.893  | 3+ | 14.9     | 18   | y <sup>9+</sup> , y <sup>10+</sup> , y <sup>12+</sup>  | 2, 3            | 1, 4           |                    | 0.67          | 18.28     | x                |               |
| SEA   | NVTVQELDLQAR                    | 693.3728  | 2+ | 9.5      | 21   | y <sup>9+</sup> , y <sup>8+</sup> , y <sup>10+</sup>   | 1, 3, 4         | 2              |                    | 1.27          | 9.65      | x                | x             |
| SEA   | QNTVPLETVK                      | 564.8166  | 2+ | 7.3      | 18   | y <sup>6+</sup> , y <sup>6++</sup> , y <sup>8+</sup>   | 1, 2, 3, 4      |                |                    | 1.00          | 0.00      | x                | x             |
| SEA   | SELQGTALGNLK                    | 615.8381  | 2+ | 8.5      | 21   | y <sup>8+</sup> , y <sup>9+</sup> , y <sup>10+</sup>   | 3, 4            | 1, 2           |                    | 0.18          | 3.46      |                  |               |
| SEA   | YNLYNSDVFDGK                    | 717.8304  | 2+ | 10       | 18   | y <sup>8+</sup> , y <sup>9+</sup> , y <sup>10+</sup>   | 1, 3, 4         | 2              |                    | 0.77          | 8.34      | x                | x             |
| SEA   | GFFTDHSWYNDLLVDFDSK             | 769.3515  | 3+ | 15.9     | 18   | y <sup>5+</sup> , y <sup>6+</sup> , y <sup>7+</sup>    | 3               | 1, 2, 4        |                    | 0.18          | 0.00      |                  |               |
| SEA   | QIYYNEK                         | 560.7691  | 2+ | 6        | 18   | y <sup>4+</sup> , y <sup>5+</sup> , y <sup>6+</sup>    | 1, 3, 4         | 2              | SEE1, 2, 3         | 0.48          | 17.08     |                  |               |
| SEA   | SELQGAALGNLK                    | 600.8328  | 2+ | 8.5      | 18   | y <sup>6+</sup> , y <sup>8+</sup> , y <sup>9+</sup>    | 1               | 2, 3, 4        |                    | 0.25          | 0.00      |                  |               |
| SEA   | GLIVFHTSTEPSVNYDLFGA QGQNSNTLLR | 1093.5529 | 3+ | 14.4     | 18   | y <sup>9+</sup> , y <sup>10+</sup> , y <sup>12+</sup>  | 1, 4            | 2, 3           |                    | 0.76          | 16.19     |                  |               |
| SEA   | GFFTNHSWYNDLLVDFDSK             | 769.0235  | 3+ | 15.4     | 18   | y <sup>5+</sup> , y <sup>6+</sup> , y <sup>7+</sup>    | 1, 4            | 2, 3           |                    | 0.04          | 120.85    |                  |               |
| SEA   | EVTVQELDLQAR                    | 700.8726  | 2+ | 9.8      | 18   | y <sup>6+</sup> , y <sup>7+</sup> , y <sup>8+</sup>    | 2               | 1, 3, 4        | SEE1, 2, 3         | 0.61          | 0.00      | x                |               |
| SEA   | SELQGVALDNLR                    | 657.8542  | 2+ | 10.1     | 18   | y <sup>5+</sup> , y <sup>6+</sup> , y <sup>8+</sup>    | 2               | 1, 3, 4        |                    | 0.86          | 0.00      |                  |               |
| SEB   | ESQDPKPKDELHK                   | 507.2511  | 3+ | 3.2      | 15   | y <sup>6+</sup> , y <sup>8++</sup> , y <sup>10++</sup> | 1, 2, 3, 4      |                |                    | 0.50          | 19.06     |                  |               |
| SEB   | FIENENSWYDMMPAPGDK              | 764.331   | 3+ | 14.3     | 18   | y <sup>4+</sup> , y <sup>6+</sup> , y <sup>12+</sup>   | 1               | 2, 3, 4        |                    | 0.01          | 13.03     |                  |               |
| SEB   | FTGLMENMK                       | 535.7541  | 2+ | 8.9      | 18   | y <sup>5+</sup> , y <sup>7+</sup> , y <sup>8+</sup>    | 1, 3, 4         | 2              | SEC 1, 2, 7, 8, 13 | 3.79          | 1.01      |                  |               |
| SEB   | IEVYLTTK                        | 483.779   | 2+ | 8.4      | 18   | y <sup>5+</sup> , y <sup>6+</sup> , y <sup>7+</sup>    | 1, 2, 3, 4      |                |                    | 1.00          | 0.00      | x                | x             |
| SEB   | LGNYDNVR                        | 475.7381  | 2+ | 4.1      | 21   | y <sup>4+</sup> , y <sup>6+</sup> , y <sup>7+</sup>    | 1, 2, 3, 4      |                |                    | 0.29          | 7.17      |                  |               |
| SEB   | NLLSFDVQTNK                     | 639.8381  | 2+ | 10.7     | 15   | y <sup>7+</sup> , y <sup>8+</sup> , y <sup>9+</sup>    | 1, 2, 3, 4      |                |                    | 0.52          | 2.71      |                  |               |

| Toxin | Peptide          | m/z      | z  | RT (min) | EC % | Fragment<br>s                                                | Variant<br>present                       | Variant<br>absent        | Commun SE                                       | Peptide<br>ratio | CV%<br>ratio | Specific<br>peptide | Heavy<br>peptide |
|-------|------------------|----------|----|----------|------|--------------------------------------------------------------|------------------------------------------|--------------------------|-------------------------------------------------|------------------|--------------|---------------------|------------------|
| SEB   | SIDQFLYFDLIYSIK  | 932.9902 | 2+ | 18.1     | 18   | y <sup>8+</sup> , y <sup>9+</sup> ,<br>y <sup>10+</sup>      | 1, 2, 3,<br>4                            |                          |                                                 | 0.43             | 17.40        |                     |                  |
| SEB   | VLYDDNHVSAINVK   | 529.6106 | 3+ | 8.3      | 15   | y <sup>11++</sup> ,<br>y <sup>12++</sup> , y <sup>13++</sup> | 1, 2, 3,<br>4                            |                          |                                                 | 4.04             | 10.63        | x                   | x                |
| SEB   | VTAQELDYLTR      | 654.8433 | 2+ | 9.7      | 21   | y <sup>6+</sup> , y <sup>7+</sup> ,<br>y <sup>8+</sup>       | 1, 2, 3,<br>4                            |                          |                                                 | 1.53             | 1.04         | x                   | x                |
| SEB   | YLMMYNDNK        | 596.2623 | 2+ | 8        | 18   | y <sup>5+</sup> , y <sup>6+</sup> ,<br>y <sup>7+</sup>       | 1, 2, 3,<br>4                            |                          | SEC 1,<br>2, 3, 4,<br>5, 7, 8,<br>10, 11,<br>13 | 0.92             | 0.72         |                     |                  |
| SEB   | LYEFNNSPYETGYIK  | 919.4358 | 2+ | 10.8     | 21   | y <sup>8+</sup> , y <sup>9+</sup> ,<br>y <sup>11+</sup>      | 1, 2, 3,<br>4                            |                          |                                                 | 0.38             | 0.01         |                     |                  |
| SEB   | FTVLMENMK        | 556.7776 | 2+ | 10.4     | 18   | y <sup>5+</sup> , y <sup>6+</sup> ,<br>y <sup>7+</sup>       | 2                                        | 1, 3, 4                  |                                                 | 1.27             | 2.70         |                     |                  |
| SEC   | ESQPDPTPDELHK    | 498.2353 | 3+ | 5.4      | 15   | y <sup>6+</sup> , y <sup>8++</sup> ,<br>y <sup>10++</sup>    | 1, 2, 3,<br>4, 7, 8,<br>10, 11,<br>13    | 5                        |                                                 | 1.00             | 0.00         | x                   |                  |
| SEC   | FLAHDLIYNISDK    | 516.9401 | 3+ | 11.1     | 15   | y <sup>3+</sup> , y <sup>5+</sup> ,<br>y <sup>6+</sup>       | 1, 2, 3,<br>4, 5, 7,<br>8, 10,<br>11, 13 |                          |                                                 | 0.09             | 13.67        |                     |                  |
| SEC   | IEVHLTTK         | 314.1869 | 3+ | 6.2      | 18   | y <sup>5++</sup> , y <sup>6++</sup> ,<br>y <sup>7++</sup>    | 1, 2, 3,<br>4, 5, 7,<br>8, 11,<br>13     | 10                       |                                                 | 0.40             | 10.80        | x                   |                  |
| SEC   | NLYEFNNSPYETGYIK | 962.9518 | 2+ | 11.3     | 21   | y <sup>8+</sup> , y <sup>11+</sup> ,<br>y <sup>12+</sup>     | 1, 2, 3,<br>4, 5, 7,<br>8, 10,<br>11, 13 |                          | SEIU 1,<br>4, 5, 6,<br>9                        | 0.35             | 7.03         | x                   | x                |
| SEC   | NTISFEVQTDK      | 641.3197 | 2+ | 8.4      | 18   | y <sup>7+</sup> , y <sup>8+</sup> ,<br>y <sup>9+</sup>       | 1, 2, 3,<br>4, 5, 7,<br>8, 10,<br>11, 13 |                          |                                                 | 0.04             | 1.20         |                     |                  |
| SEC   | SSEFTGTMGNMK     | 430.5215 | 3+ | 7.2      | 18   | y <sup>2+</sup> , y <sup>4+</sup> ,<br>y <sup>5+</sup>       | 3, 4, 5,<br>11                           | 1, 2, 7,<br>8, 10,<br>13 |                                                 | 0.01             | 15.25        |                     |                  |
| SEC   | SVTAQELDIK       | 552.3008 | 2+ | 7.8      | 18   | y <sup>6+</sup> , y <sup>7+</sup> ,<br>y <sup>8+</sup>       | 1, 2, 3,<br>4, 5, 7,<br>8, 10,<br>11, 13 |                          |                                                 | 0.96             | 3.01         | x                   |                  |
| SEC   | TELLNEDLAK       | 573.3061 | 2+ | 8.6      | 18   | y <sup>6+</sup> , y <sup>7+</sup> ,<br>y <sup>8+</sup>       | 2, 3, 4,<br>5, 7, 8,<br>10, 11,          | 1                        |                                                 | 0.55             | 18.15        |                     |                  |

| Toxin | Peptide        | m/z      | z  | RT (min) | EC % | Fragment<br>s                                               | Variant<br>present                             | Variant<br>absent                     | Commun SE         | Peptid<br>e ratio | CV%<br>ratio | Specific<br>peptide | Heavy<br>peptid<br>e |
|-------|----------------|----------|----|----------|------|-------------------------------------------------------------|------------------------------------------------|---------------------------------------|-------------------|-------------------|--------------|---------------------|----------------------|
| SEC   | YLMMYNDNK      | 596.2623 | 2+ | 8        | 18   | y <sup>5+</sup> , y <sup>6+</sup> ,<br>y <sup>7+</sup>      | 13<br>1, 2, 3,<br>4, 5, 7,<br>8, 10,<br>11, 13 |                                       | SEB 1,<br>2, 3, 4 | 0.30              | 0.31         |                     |                      |
| SEC   | YLYDDHYVSATK   | 492.2331 | 3+ | 7.3      | 15   | y <sup>9++</sup> , y <sup>10++</sup> ,<br>y <sup>11++</sup> | 3, 4, 5,<br>11                                 | 1, 2, 7,<br>8, 10,<br>13              |                   | 1.31              | 0.04         |                     |                      |
| SEC   | FTGLMENMK      | 535.7541 | 2+ | 8.9      | 18   | y <sup>5+</sup> , y <sup>7+</sup> ,<br>y <sup>8+</sup>      | 1, 2, 7,<br>8, 13                              | 3, 4, 5,<br>10, 11                    |                   | 0.61              | 4.72         |                     |                      |
| SEC   | LQNVLIR        | 428.2742 | 2+ | 8        | 21   | y <sup>3+</sup> , y <sup>4+</sup> ,<br>y <sup>5+</sup>      | 1, 2, 3,<br>4, 7, 8,<br>10, 11,<br>13          | 5                                     | SEB 1,<br>3, 4    | 0.01              | 5.30         |                     |                      |
| SEC   | VLYDDHYVSATK   | 470.9015 | 3+ | 6.9      | 18   | y <sup>9++</sup> , y <sup>10++</sup> ,<br>y <sup>11++</sup> | 1                                              | 2, 3, 4,<br>5, 7, 8,<br>10, 11,<br>13 |                   | 1.14              | 1.68         |                     |                      |
| SEC   | TELLNEGLAK     | 544.3033 | 2+ | 8.3      | 18   | y <sup>6+</sup> , y <sup>7+</sup> ,<br>y <sup>8+</sup>      | 1                                              | 2, 3, 4,<br>5, 7, 8,<br>10, 11,<br>13 |                   | 0.47              | 4.37         |                     |                      |
| SED   | IPINLWINGVQK   | 697.9114 | 2+ | 13.2     | 21   | y <sup>7+</sup> , y <sup>9+</sup> ,<br>y <sup>11++</sup>    | 1, 2, 3,<br>5                                  |                                       |                   | 0.07              | 13.16        |                     |                      |
| SED   | LYNNDTLGGK     | 547.7775 | 2+ | 5.2      | 18   | y <sup>7+</sup> , y <sup>8+</sup> ,<br>y <sup>9+</sup>      | 1, 2, 3,<br>5                                  |                                       |                   | 1.00              | 0.00         | x                   | x                    |
| SED   | NVDVYAIR       | 475.2587 | 2+ | 8        | 18   | y <sup>4+</sup> , y <sup>5+</sup> ,<br>y <sup>6+</sup>      | 1, 2, 3,<br>5                                  |                                       |                   | 0.69              | 1.51         |                     |                      |
| SED   | NVTVQELDAQAR   | 672.3493 | 2+ | 7.7      | 21   | y <sup>7+</sup> , y <sup>8+</sup> ,<br>y <sup>10+</sup>     | 1, 2, 3,<br>5                                  |                                       |                   | 1.65              | 1.12         | x                   |                      |
| SED   | STGDQFLENTLLYK | 814.912  | 2+ | 12.3     | 21   | y <sup>7+</sup> , y <sup>8+</sup> ,<br>y <sup>9+</sup>      | 1, 2, 3,<br>5                                  |                                       |                   | 0.67              | 3.12         |                     |                      |
| SED   | VSYDLFDVK      | 543.2793 | 2+ | 11.3     | 18   | y <sup>6+</sup> , y <sup>7+</sup> ,<br>y <sup>8+</sup>      | 1, 2, 3,<br>5                                  |                                       |                   | 1.08              | 12.29        | x                   | x                    |
| SED   | NPIIGENK       | 442.7454 | 2+ | 4.2      | 18   | y <sup>4+</sup> , y <sup>5+</sup> ,<br>y <sup>7++</sup>     | 1, 2, 3,<br>5                                  |                                       |                   | 0.02              | 10.26        |                     |                      |
| SED   | IEFDSSDESK     | 578.7539 | 2+ | 5.3      | 21   | y <sup>7+</sup> , y <sup>8+</sup> ,<br>y <sup>9+</sup>      | 3                                              | 1, 2, 5                               |                   | 0.01              | 13.72        |                     |                      |
| SED   | IEFDSSDGSK     | 542.7433 | 2+ | 5        | 18   | y <sup>7+</sup> , y <sup>8+</sup> ,<br>y <sup>9+</sup>      | 1, 2, 5                                        | 3                                     |                   | 0.06              | 11.79        |                     |                      |
| SEE   | ESDDQFLENTLLFK | 849.9147 | 2+ | 14.2     | 18   | y <sup>7+</sup> , y <sup>8+</sup> ,<br>y <sup>9+</sup>      | 1, 2, 3                                        |                                       |                   | 0.28              | 11.57        |                     |                      |
| SEE   | EVTVQELDLQAR   | 700.8726 | 2+ | 9.8      | 21   | y <sup>6+</sup> , y <sup>7+</sup> ,<br>y <sup>8+</sup>      | 1, 2, 3                                        |                                       | SEA 2             | 1.30              | 13.38        | x                   | x                    |
| SEE   | FGLYNSDSFGGK   | 646.3013 | 2+ | 9.7      | 21   | y <sup>7+</sup> , y <sup>8+</sup>                           | 1, 2, 3                                        |                                       |                   | 1.00              | 0.00         | x                   | x                    |

| Toxin | Peptide                            | m/z           | z  | RT (min) | EC % | Fragment s                                                                  | Variant present     | Variant absent | Commun SE      | Peptide ratio | CV% ratio | Specific peptide | Heavy peptide |
|-------|------------------------------------|---------------|----|----------|------|-----------------------------------------------------------------------------|---------------------|----------------|----------------|---------------|-----------|------------------|---------------|
| SEE   | GFFTGHPWYNDLLVDLGSK                | 722.6933      | 3+ | 15.6     | 15   | y <sup>9+</sup><br>y <sup>6+</sup> , y <sup>7+</sup> ,<br>y <sup>17++</sup> | 1                   | 2, 3           |                | 1.73          | 18.59     |                  |               |
| SEE   | GLIVFHSSEGSTVSYDLFDAQ<br>GQYPDTLLR | 1105.877<br>1 | 3+ | 15.2     | 21   | y <sup>6+</sup> , y <sup>9+</sup> ,<br>y <sup>12+</sup>                     | 1, 3                | 2              |                | 0.72          | 0.36      |                  |               |
| SEE   | QIYYNEK                            | 560.7691      | 2+ | 6.1      | 18   | y <sup>4+</sup> , y <sup>5+</sup> ,<br>y <sup>6+</sup>                      | 1, 2, 3             |                | SEA 1,<br>3, 4 | 1.16          | 13.32     | x                |               |
| SEE   | QTTVPIDK                           | 451.2531      | 2+ | 5        | 21   | y <sup>2+</sup> , y <sup>4+</sup> ,<br>y <sup>6+</sup>                      | 1, 2, 3             |                |                | 1.17          | 15.40     | x                | x             |
| SEE   | SELQGIALSNLR                       | 650.8646      | 2+ | 9.8      | 21   | y <sup>5+</sup> , y <sup>6+</sup> ,<br>y <sup>8+</sup>                      | 2                   | 1, 3           |                | 0.05          | 11.77     |                  |               |
| SEG   | ELVPFVPYK                          | 546.3104      | 2+ | 12.2     | 18   | y <sup>3+</sup> , y <sup>6+</sup> ,<br>y <sup>6++</sup>                     | 1, 2, 3,<br>4, 5, 7 |                |                | 2.30          | 16.41     | x                |               |
| SEG   | FLNIYGDNK                          | 542.2771      | 2+ | 9.1      | 21   | y <sup>4+</sup> , y <sup>5+</sup> ,<br>y <sup>7+</sup>                      | 1, 2, 3,<br>4, 5, 7 |                |                | 0.65          | 13.29     | x                | x             |
| SEG   | NMVTIQELDYK                        | 677.3396      | 2+ | 10.2     | 21   | y <sup>6+</sup> , y <sup>8+</sup> ,<br>y <sup>9+</sup>                      | 1, 2, 3,<br>4, 5, 7 |                |                | 1.21          | 3.78      | x                |               |
| SEG   | QFLSHDLIFPIEYK                     | 583.9785      | 3+ | 13.7     | 18   | y <sup>5+</sup> , y <sup>5++</sup> ,<br>y <sup>6+</sup>                     | 1, 2, 3,<br>4, 5, 7 |                |                | 3.09          | 17.47     | x                |               |
| SEG   | QSLGFTITTNK                        | 605.3273      | 2+ | 9.3      | 21   | y <sup>4+</sup> , y <sup>6+</sup> ,<br>y <sup>8+</sup>                      | 1, 2, 3,<br>4, 5, 7 |                |                | 1.00          | 0.00      | x                | x             |
| SEG   | GTMGNVMNLYTSPPEGR                  | 961.9586      | 2+ | 11.5     | 21   | y <sup>6+</sup> , y <sup>9+</sup> ,<br>y <sup>12+</sup>                     | 3, 7                | 1, 2, 4,<br>5  |                | 1.12          | 6.47      |                  |               |
| SEG   | LYEFDGSAFESGYIK                    | 863.404       | 2+ | 12.3     | 18   | y <sup>11+</sup> , y <sup>12+</sup> ,<br>y <sup>13+</sup>                   | 1, 2, 3,<br>4, 5, 7 |                |                | 0.28          | 14.82     |                  |               |
| SEH   | VIGANVWVDGIQK                      | 699.8906      | 2+ | 11.2     | 21   | y <sup>7+</sup> , y <sup>9+</sup> ,<br>y <sup>11+</sup>                     | 1, 2, 4             | 3              |                | 0.74          | 7.95      |                  |               |
| SEH   | DYSFDIYDLK                         | 639.7981      | 2+ | 12.7     | 15   | y <sup>6+</sup> , y <sup>7+</sup> ,<br>y <sup>8+</sup>                      | 1, 2, 3,<br>4       |                |                | 0.18          | 2.25      |                  |               |
| SEH   | ETELIR                             | 380.7136      | 2+ | 4.7      | 15   | y <sup>1+</sup> , y <sup>2+</sup> ,<br>y <sup>3+</sup>                      | 1, 2, 3,<br>4       |                |                | 0.45          | 9.22      |                  |               |
| SEH   | FATADLAQK                          | 482.7585      | 2+ | 6.5      | 18   | y <sup>6+</sup> , y <sup>7+</sup> ,<br>y <sup>8+</sup>                      | 1, 2, 3,<br>4       |                |                | 0.66          | 3.43      | x                | x             |
| SEH   | GLIEFDMK                           | 476.7441      | 2+ | 11       | 15   | y <sup>2+</sup> , y <sup>5+</sup> ,<br>y <sup>6+</sup>                      | 1, 2, 3,<br>4       |                |                | 0.77          | 15.76     | x                |               |
| SEH   | NVDIYGASFYYK                       | 720.3457      | 2+ | 11       | 15   | y <sup>7+</sup> , y <sup>8+</sup> ,<br>y <sup>10+</sup>                     | 2, 3, 4             | 1              |                | 0.32          | 81.21     |                  |               |
| SEH   | SVDIYGASFYYK                       | 706.8403      | 2+ | 11.1     | 18   | y <sup>7+</sup> , y <sup>8+</sup> ,<br>y <sup>10+</sup>                     | 1                   | 2, 3, 4        |                | 0.25          | 46.56     |                  |               |
| SEH   | NVTLQELDIK                         | 586.8297      | 2+ | 10.3     | 15   | y <sup>6+</sup> , y <sup>7+</sup> ,<br>y <sup>8+</sup>                      | 1, 2, 3,<br>4       |                |                | 0.71          | 27.18     | x                | x             |
| SEH   | SDDISHIDVNLYTK                     | 540.6019      | 3+ | 9.8      | 15   | y <sup>10++</sup> ,<br>y <sup>12++</sup> , y <sup>13++</sup>                | 1, 2, 3,<br>4       |                |                | 1.00          | 0.00      | x                | x             |
| SEH   | SELTDLALANAYGQYNHPFI<br>K          | 789.0656      | 3+ | 13       | 18   | y <sup>15++</sup> ,<br>y <sup>18++</sup> , y <sup>19++</sup>                | 1, 2, 3,<br>4       |                |                | 0.01          | 14.94     |                  |               |

| Toxin | Peptide             | m/z      | z  | RT (min) | EC % | Fragment s                                                | Variant present                         | Variant absent                   | Commun SE | Peptide ratio | CV% ratio | Specific peptide | Heavy peptide |
|-------|---------------------|----------|----|----------|------|-----------------------------------------------------------|-----------------------------------------|----------------------------------|-----------|---------------|-----------|------------------|---------------|
| SEI   | LVTAQEIDVK          | 558.319  | 2+ | 8        | 18   | y <sup>6+</sup> , y <sup>7+</sup> , y <sup>8+</sup>       | 1, 2, 3, 4, 5, 6, 8, 10, 11, 12, 13, 15 |                                  | SEK 5, 8  | 1.00          | 0.00      | x                | x             |
| SEI   | SFSYDLFYTGDLVPSFLK  | 719.3577 | 3+ | 17.2     | 18   | y <sup>6+</sup> , y <sup>6++</sup> , y <sup>10+</sup>     | 1, 3, 4, 5, 10                          | 2, 6, 8, 11, 12, 13, 15          |           | 0.02          | 15.85     |                  |               |
| SEI   | VLFHLNNEK           | 371.8732 | 3+ | 7.6      | 15   | y <sup>6++</sup> , y <sup>7++</sup> , y <sup>8++</sup>    | 3, 4, 15                                | 6, 8, 10, 11, 12, 13             |           | 2.98          | 19.46     | x                |               |
| SEI   | VLFHLNDEK           | 372.2012 | 3+ | 7.9      | 15   | y <sup>2+</sup> , y <sup>7++</sup> , y <sup>8++</sup>     | 6, 8, 10, 11, 12, 13                    | 3, 4, 15                         |           | 1.33          | 10.72     | x                |               |
| SEI   | YLQEEYNIYGHNNTGK    | 648.3025 | 3+ | 7.6      | 18   | y <sup>8+</sup> , y <sup>14++</sup> , y <sup>15++</sup>   | 1, 3, 4, 6, 8, 11, 13, 15               | 2, 5, 10, 12                     |           | 0.64          | 16.21     | x                | x             |
| SEI   | YLQEEYNIYGHNNNGK    | 653.9700 | 3+ | 7.4      | 15   | y <sup>12++</sup> , y <sup>13++</sup> , y <sup>14++</sup> | 5, 10                                   | 1, 2, 3, 4, 6, 8, 11, 12, 13, 15 |           | 0.38          | 8.06      |                  |               |
| SEI   | HDYIDLK             | 452.2322 | 2+ | 6.7      | 21   | y <sup>2+</sup> , y <sup>5+</sup> , y <sup>6+</sup>       | 2, 3, 4, 6, 12, 15                      | 1, 5, 8, 10, 11, 13              |           | 2.17          | 11.31     |                  |               |
| SEI   | QGDIGVGNLR          | 514.7778 | 2+ | 7.1      | 21   | y <sup>4+</sup> , y <sup>5+</sup> , y <sup>6+</sup>       | 1, 2, 3, 4, 5, 6, 8, 10, 11, 12, 13, 15 |                                  |           | 0.73          | 13.24     | x                | x             |
| SEI   | IPINLWVNGK          | 579.3436 | 2+ | 11.6     | 21   | y <sup>7+</sup> , y <sup>8+</sup> , y <sup>9++</sup>      | 4, 6, 8, 11, 13, 15                     | 5, 10, 12                        |           | 0.25          | 11.75     |                  |               |
| SEI   | IPINLWINGK          | 586.3515 | 2+ | 12.4     | 21   | y <sup>7+</sup> , y <sup>8+</sup> , y <sup>9++</sup>      | 5, 10                                   | 1, 2, 3, 4, 6, 8, 11, 12, 13, 15 |           | 0.28          | 12.69     |                  |               |
| SEIJ  | SFFISHSQYNDLLVQFDSK | 759.0392 | 3+ | 14       | 18   | y <sup>6+</sup> , y <sup>7+</sup> , y <sup>7++</sup>      | 1, 2, 3, 4                              |                                  |           | 0.04          | 25.71     |                  |               |
| SEIJ  | IMTEDQFLDYTLLEK     | 626.3182 | 3+ | 16.5     | 18   | y <sup>6+</sup> , y <sup>7+</sup> , y <sup>8+</sup>       | 1, 2, 3, 4                              |                                  |           | 0.11          | 2.08      | x                |               |
| SEIJ  | TVVPLDIVK           | 492.3104 | 2+ | 11.3     | 21   | y <sup>6+</sup> , y <sup>6++</sup> , y <sup>7+</sup>      | 1, 2, 3, 4                              |                                  |           | 0.01          | 35.15     |                  |               |

| Toxin | Peptide                      | m/z      | z  | RT (min) | EC % | Fragment<br>s                                              | Variant<br>present                          | Variant<br>absent   | Commun SE                                                      | Peptid<br>e ratio | CV%<br>ratio | Specific<br>peptide | Heavy<br>peptid<br>e |
|-------|------------------------------|----------|----|----------|------|------------------------------------------------------------|---------------------------------------------|---------------------|----------------------------------------------------------------|-------------------|--------------|---------------------|----------------------|
| SEIJ  | QYNLYNPSTFGGK                | 744.8595 | 2+ | 9.6      | 18   | y <sup>8+</sup> , y <sup>9+</sup> ,<br>y <sup>11+</sup>    | 2, 3                                        | 1, 4                |                                                                | 0.34              | 1.52         | x                   |                      |
| SEIJ  | SELSSITLNNLR                 | 673.8673 | 2+ | 10.8     | 18   | y <sup>4+</sup> , y <sup>6+</sup> ,<br>y <sup>9+</sup>     | 1, 2, 3,<br>4                               |                     |                                                                | 1.00              | 0.00         | x                   |                      |
| SEIJ  | VTIQELDLQAR                  | 643.3592 | 2+ | 10.1     | 18   | y <sup>6+</sup> , y <sup>7+</sup> ,<br>y <sup>8+</sup>     | 1, 2, 3,<br>4                               |                     |                                                                | 0.75              | 11.44        | x                   |                      |
| SEK   | DFVDLK                       | 368.6974 | 2+ | 8.4      | 18   | y <sup>2+</sup> , y <sup>3+</sup> ,<br>y <sup>4+</sup>     | 1, 3, 5,<br>7, 8                            | 2, 4, 9             |                                                                | 0.08              | 1.81         |                     |                      |
| SEK   | DNDTPIANQLQFSNESYDLIS<br>ESK | 910.091  | 3+ | 13.4     | 18   | y <sup>8+</sup> , y <sup>15++</sup> ,<br>y <sup>20++</sup> | 1, 2, 3,<br>4, 5, 7,<br>8, 9                |                     |                                                                | 0.01              | 15.76        |                     |                      |
| SEK   | FYSGFNIGK                    | 516.7611 | 2+ | 9.5      | 18   | y <sup>6+</sup> , y <sup>7+</sup> ,<br>y <sup>8+</sup>     | 1, 2, 3,<br>4, 5, 7,<br>8, 9                |                     |                                                                | 1.00              | 0.00         | x                   |                      |
| SEK   | NIPINIWINGNHK                | 766.9202 | 2+ | 11.6     | 21   | y <sup>7+</sup> , y <sup>11+</sup> ,<br>y <sup>11++</sup>  | 1, 2, 3,<br>4, 5, 7,<br>8, 9                |                     |                                                                | 0.18              | 3.37         | x                   |                      |
| SEK   | QGDIGIDNLR                   | 550.7884 | 2+ | 8.2      | 21   | y <sup>4+</sup> , y <sup>5+</sup> ,<br>y <sup>6+</sup>     | 1, 2, 3,<br>4, 5, 7,<br>8, 9                |                     |                                                                | 0.81              | 7.52         | x                   |                      |
| SEK   | VTFHLNNNDTFSYDLFYTG<br>DGLPK | 965.1154 | 3+ | 14.4     | 18   | y <sup>8+</sup> , y <sup>9+</sup> ,<br>y <sup>10+</sup>    | 1, 2, 3,<br>4, 5, 7                         | 8, 9                |                                                                | 0.23              | 14.11        |                     |                      |
| SEK   | YLQEEYNIYGHNGTK              | 610.2882 | 3+ | 7.6      | 18   | y <sup>7+</sup> , y <sup>12++</sup> ,<br>y <sup>13++</sup> | 1, 2, 3,<br>4, 5, 7,<br>8, 9                |                     |                                                                | 0.06              | 15.72        |                     |                      |
| SEK   | FVTAQEIDVK                   | 575.3111 | 2+ | 8.5      | 18   | y <sup>6+</sup> , y <sup>7+</sup> ,<br>y <sup>8+</sup>     | 1, 4, 7                                     | 2, 3, 5,<br>8, 9    |                                                                | 1.52              | 3.31         |                     |                      |
| SEK   | LVTAQEIDVK                   | 558.319  | 2+ | 8        | 18   | y <sup>6+</sup> , y <sup>7+</sup> ,<br>y <sup>8+</sup>     | 5, 8                                        | 1, 2, 3,<br>4, 7, 9 | SEI 1,<br>2, 3, 4,<br>5, 6, 8,<br>10, 11,<br>12, 13,<br>15, 17 | 1.22              | 5.14         | x                   |                      |
| SEK   | FVTAQEIDIK                   | 582.319  | 2+ | 9.4      | 18   | y <sup>6+</sup> , y <sup>7+</sup> ,<br>y <sup>8+</sup>     | 2, 9                                        | 1, 3, 4,<br>5, 7, 8 |                                                                | 0.04              | 24.52        |                     |                      |
| SEL   | FYSGFDK                      | 432.2003 | 2+ | 6.7      | 21   | y <sup>2+</sup> , y <sup>5+</sup> ,<br>y <sup>6+</sup>     | 1, 2, 4,<br>5, 6, 7,<br>8, 9, 10,<br>12, 13 |                     |                                                                | 0.51              | 1.51         | x                   |                      |
| SEL   | IIPINLIINGK                  | 604.3923 | 2+ | 14       | 15   | y <sup>7+</sup> , y <sup>9+</sup> ,<br>y <sup>9++</sup>    | 1, 2, 4,<br>5, 6, 7,<br>8, 9, 10,<br>12, 13 |                     |                                                                | 2.87              | 9.07         | x                   |                      |
| SEL   | MVTAQEIDVK                   | 567.2972 | 2+ | 7.7      | 18   | y <sup>6+</sup> , y <sup>7+</sup> ,<br>y <sup>8+</sup>     | 1, 2, 4,<br>5, 6, 7,                        |                     |                                                                | 1.12              | 12.32        |                     |                      |



| Toxin | Peptide                           | m/z           | z  | RT (min) | EC % | Fragment s                                                                                  | Variant present                                      | Variant absent              | Commun SE | Peptide ratio | CV% ratio | Specific peptide | Heavy peptide |
|-------|-----------------------------------|---------------|----|----------|------|---------------------------------------------------------------------------------------------|------------------------------------------------------|-----------------------------|-----------|---------------|-----------|------------------|---------------|
| SEL   | NVDVFGISYK                        | 571.298       | 2+ | 11.1     | 15   | y <sub>6</sub> <sup>+</sup> , y <sub>7</sub> <sup>+</sup> , y <sub>8</sub> <sup>+</sup>     | 8, 9, 10, 12, 13, 1, 2, 4, 5, 6, 7, 8, 9, 10, 12, 13 |                             |           | 1.36          | 15.18     | x                |               |
| SEL   | YEYVNLK                           | 464.7424      | 2+ | 7.4      | 18   | y <sub>4</sub> <sup>+</sup> , y <sub>5</sub> <sup>+</sup> , y <sub>6</sub> <sup>+</sup>     | 5, 6, 7, 8, 9, 12, 13                                | 10                          |           | 1.00          | 0.00      | x                |               |
| SEL   | YLQDEFNIYGHNDTGK                  | 638.627       | 3+ | 9.4      | 15   | y <sub>8</sub> <sup>+</sup> , y <sub>13</sub> <sup>++</sup> , y <sub>14</sub> <sup>++</sup> | 5, 6, 7, 8, 9, 10, 12, 13                            |                             |           | 0.50          | 18.91     |                  |               |
| SEL   | TIYGGVTK                          | 419.7371      | 2+ | 4.7      | 15   | y <sub>5</sub> <sup>+</sup> , y <sub>6</sub> <sup>+</sup> , y <sub>7</sub> <sup>+</sup>     | 5, 6, 7, 8, 9, 10, 12, 13                            |                             |           | 0.89          | 1.74      |                  |               |
| SEL   | NVDIFGISYK                        | 578.3059      | 2+ | 12.1     | 18   | y <sub>5</sub> <sup>+</sup> , y <sub>6</sub> <sup>+</sup> , y <sub>8</sub> <sup>+</sup>     | 8, 12                                                | 1, 2, 4, 5, 6, 7, 9, 10, 13 |           | 1.11          | 5.34      |                  |               |
| SEM   | DVGVLNLR                          | 443.2613      | 2+ | 9.8      | 18   | y <sub>3</sub> <sup>+</sup> , y <sub>4</sub> <sup>+</sup> , y <sub>6</sub> <sup>+</sup>     | 1, 2, 3, 4, 5, 6, 8, 9, 15                           |                             |           | 1.00          | 0.00      | x                | x             |
| SEM   | ILFHLNDGSSFSYDLFDGTGTG<br>QAESFLK | 1037.164<br>5 | 3+ | 16.2     | 18   | y <sub>8</sub> <sup>+</sup> , y <sub>12</sub> <sup>+</sup> , y <sub>13</sub> <sup>+</sup>   | 3, 4, 8, 15                                          | 1, 2, 5, 6, 9               |           | 0.13          | 18.46     |                  |               |
| SEM   | LVTAQEIDTK                        | 559.3086      | 2+ | 6.5      | 18   | y <sub>6</sub> <sup>+</sup> , y <sub>7</sub> <sup>+</sup> , y <sub>8</sub> <sup>+</sup>     | 3, 4, 6, 8, 15                                       | 1, 2, 5, 9                  |           | 0.68          | 2.98      | x                |               |
| SEM   | IVTAQEIDTK                        | 559.3086      | 2+ | 6.3      | 21   | y <sub>6</sub> <sup>+</sup> , y <sub>7</sub> <sup>+</sup> , y <sub>8</sub> <sup>+</sup>     | 1, 2, 5, 9                                           | 3, 4, 6, 8, 15              |           | 0.61          | 0.22      | x                |               |
| SEM   | YLQEEYNIYGFNDTNK                  | 1005.957<br>6 | 2+ | 10.8     | 21   | y <sub>7</sub> <sup>+</sup> , y <sub>8</sub> <sup>+</sup> , y <sub>12</sub> <sup>+</sup>    | 1, 2, 3, 4, 5, 6, 8, 9, 15                           |                             |           | 0.10          | 4.11      | x                |               |
| SEM   | YIYGGVTLAGDYLEK                   | 831.4247      | 2+ | 12.2     | 18   | y <sub>9</sub> <sup>+</sup> , y <sub>12</sub> <sup>+</sup> , y <sub>13</sub> <sup>+</sup>   | 3, 4, 6, 8, 15                                       | 1, 2, 5, 9                  |           | 0.19          | 13.32     |                  |               |
| SEM   | YMYGGVTLAGDYLEK                   | 840.4029      | 2+ | 11.9     | 18   | y <sub>9</sub> <sup>+</sup> , y <sub>12</sub> <sup>+</sup> , y <sub>13</sub> <sup>+</sup>   | 1, 2, 5, 9                                           | 3, 4, 6, 8, 15              |           | 0.02          | 23.85     |                  |               |
| SEN   | DGVQQEGFVIK                       | 610.3195      | 2+ | 9        | 18   | y <sub>6</sub> <sup>+</sup> , y <sub>7</sub> <sup>+</sup> , y <sub>8</sub> <sup>+</sup>     | 1, 2, 3, 5, 6, 7, 8                                  | 4, 9                        |           | 0.42          | 8.70      |                  |               |
| SEN   | GSVGAEFFQFYSDNR                   | 862.3892      | 2+ | 12.8     | 21   | y <sub>8</sub> <sup>+</sup> , y <sub>9</sub> <sup>+</sup> , y <sub>10</sub> <sup>+</sup>    | 1, 2, 3, 4, 5, 6, 7, 8                               | 9                           |           | 0.97          | 3.94      |                  |               |
| SEN   | ISTDQLLNNTIILK                    | 793.4616      | 2+ | 13.3     | 18   | y <sub>7</sub> <sup>+</sup> , y <sub>8</sub> <sup>+</sup>                                   | 1, 2, 3                                              | 9                           |           | 0.15          | 25.87     |                  |               |

| Toxin | Peptide             | m/z      | z  | RT (min) | EC % | Fragment s                                                             | Variant present                       | Variant absent                 | Commun SE | Peptide ratio | CV% ratio | Specific peptide | Heavy peptide |
|-------|---------------------|----------|----|----------|------|------------------------------------------------------------------------|---------------------------------------|--------------------------------|-----------|---------------|-----------|------------------|---------------|
| SEN   | NIDISVLK            | 451.2713 | 2+ | 10.2     | 15   | y <sup>9+</sup><br>y <sup>4+</sup> , y <sup>5+</sup> , y <sup>6+</sup> | 4, 5, 6, 7, 8<br>1, 2, 3, 5, 6, 7, 8  | 4, 9                           |           | 1.92          | 3.79      | x                |               |
| SEN   | NIDIYGLYFGNK        | 708.8615 | 2+ | 13.2     | 18   | y <sup>7+</sup> , y <sup>8+</sup> , y <sup>10+</sup>                   | 3, 5, 7                               | 1, 2, 4, 6, 8, 9               |           | 1.44          | 20.30     | x                |               |
| SEN   | VTVQELDTK           | 516.7822 | 2+ | 6.4      | 18   | y <sup>6+</sup> , y <sup>7+</sup> , y <sup>8+</sup>                    | 1, 2, 3, 4, 5, 6, 7, 8, 9             |                                |           | 1.00          | 0.00      | x                | x             |
| SEO   | FLDFDLLFK           | 579.3157 | 2+ | 16.7     | 18   | y <sup>6+</sup> , y <sup>7+</sup> , y <sup>8+</sup>                    | 1, 2, 3, 5, 6, 7, 8, 9, 14, 19, 21    | 4                              |           | 0.44          | 128.25    | x                |               |
| SEO   | GNLPDQYLQIYNDNK     | 598.9601 | 3+ | 11.05    | 18   | y <sup>5+</sup> , y <sup>8+</sup> , y <sup>12++</sup>                  | 1, 2, 3, 4, 6, 7, 9, 14, 19, 21       | 5, 8                           |           | 0.08          | 3.52      |                  |               |
| SEO   | SSVDPIALHNINDDYINNR | 724.0223 | 3+ | 10.4     | 21   | y <sup>5+</sup> , y <sup>8+</sup> , y <sup>15++</sup>                  | 3, 6, 8, 21                           | 1, 2, 4, 5, 7, 9, 14, 19       |           | 0.59          | 2.71      |                  |               |
| SEO   | TVDIYGVYYK          | 610.8135 | 2+ | 10       | 18   | y <sup>6+</sup> , y <sup>7+</sup> , y <sup>8+</sup>                    | 1, 2, 3, 4, 5, 6, 7, 8, 9, 14, 19, 21 |                                |           | 1.00          | 0.00      | x                |               |
| SEO   | VTAQELDIK           | 508.7848 | 2+ | 7.3      | 18   | y <sup>6+</sup> , y <sup>8+</sup> , y <sup>8++</sup>                   | 1, 2, 3, 4, 5, 6, 7, 8, 9, 14, 19, 21 |                                |           | 0.42          | 42.96     | x                | x             |
| SEO   | SINWLDGISAK         | 602.322  | 2+ | 11.8     | 18   | y <sup>7+</sup> , y <sup>8+</sup> , y <sup>9+</sup>                    | 6, 21                                 | 1, 2, 3, 4, 5, 7, 8, 9, 14, 19 |           | 0.18          | 99.54     |                  |               |
| SEO   | SINWLDGISAEFK       | 740.3775 | 2+ | 14.7     | 21   | y <sup>8+</sup> , y <sup>9+</sup> , y <sup>11+</sup>                   | 3, 8, 14                              | 1, 2, 4, 5, 6, 7, 9, 19, 21    |           | 0.22          | 90.40     |                  |               |
| SEO   | ESFYDDLFIK          | 744.3583 | 2+ | 14.8     | 18   | y <sup>6+</sup> , y <sup>7+</sup> , y <sup>8+</sup>                    | 1, 2, 3, 4, 5, 6, 7, 9, 14, 19, 21    | 8                              |           | 0.03          | 141.42    |                  |               |
| SEP   | ESNDQFLK            | 490.7378 | 2+ | 5.4      | 18   | y <sup>2+</sup> , y <sup>3+</sup> , y <sup>6+</sup>                    | 2, 3, 4                               |                                |           | 0.17          | 0.13      |                  |               |

| Toxin | Peptide                             | m/z       | z  | RT (min) | EC % | Fragment s                                                                                    | Variant present | Variant absent | Commun SE | Peptide ratio | CV% ratio | Specific peptide | Heavy peptide |
|-------|-------------------------------------|-----------|----|----------|------|-----------------------------------------------------------------------------------------------|-----------------|----------------|-----------|---------------|-----------|------------------|---------------|
| SEP   | EVTVQELDLQSR                        | 708.8701  | 2+ | 9.4      | 21   | y <sub>6</sub> <sup>+</sup> , y <sub>7</sub> <sup>+</sup> , y <sub>8</sub> <sup>+</sup>       | 2, 3            | 4              |           | 0.89          | 4.40      | x                |               |
| SEP   | GLIEFHPSSGDSVGYDLFGA<br>QGQYPDTQLR  | 1085.5178 | 3+ | 14       | 18   | y <sub>6</sub> <sup>+</sup> , y <sub>9</sub> <sup>+</sup> , y <sub>12</sub> <sup>+</sup>      | 2, 3, 4         |                |           | 1.12          | 0.55      | x                |               |
| SEP   | QNTVPLGTVK                          | 528.806   | 2+ | 7        | 21   | y <sub>6</sub> <sup>+</sup> , y <sub>7</sub> <sup>+</sup> , y <sub>8</sub> <sup>+</sup>       | 2, 3, 4         |                |           | 1.00          | 0.00      | x                |               |
| SEP   | SELQGTALSCLR                        | 644.8464  | 2+ | 8.7      | 18   | y <sub>4</sub> <sup>+</sup> , y <sub>8</sub> <sup>+</sup> , y <sub>9</sub> <sup>+</sup>       | 2, 3, 4         |                | SEE 3     | 0.45          | 7.47      | x                | x             |
| SEQ   | DVGVINLR                            | 443.2613  | 2+ | 9.3      | 15   | y <sub>3</sub> <sup>+</sup> , y <sub>4</sub> <sup>+</sup> , y <sub>6</sub> <sup>+</sup>       | 1, 2, 3, 4, 5   |                |           | 2.08          | 2.74      | x                |               |
| SEQ   | EVTAQEIDIK                          | 573.3061  | 2+ | 7.7      | 18   | y <sub>5</sub> <sup>+</sup> , y <sub>6</sub> <sup>+</sup> , y <sub>8</sub> <sup>+</sup>       | 1, 2, 3, 4, 5   |                |           | 1.00          | 0.00      | x                | x             |
| SEQ   | FNSGFNK                             | 407.1981  | 2+ | 3.6      | 18   | y <sub>2</sub> <sup>+</sup> , y <sub>5</sub> <sup>+</sup> , y <sub>6</sub> <sup>+</sup>       | 1, 2, 3, 4, 5   |                |           | 0.30          | 6.16      |                  |               |
| SEQ   | ITFHLNNETSFTYDLFYTG<br>QAESFLK      | 1082.1873 | 3+ | 16.2     | 18   | y <sub>10</sub> <sup>+</sup> , y <sub>11</sub> <sup>+</sup> , y <sub>20</sub> <sup>++</sup>   | 5               | 1, 2, 3, 4     |           | 0.03          | 16.10     |                  |               |
| SEQ   | ITFHLNNEPSFTYDLFYTG<br>QAESFLK      | 1080.8557 | 3+ | 16.2     | 18   | y <sub>10</sub> <sup>+</sup> , y <sub>11</sub> <sup>+</sup> , y <sub>12</sub> <sup>+</sup>    | 1, 2, 3, 4      | 5              |           | 0.13          | 18.50     |                  |               |
| SEQ   | NFYTNYQPETLQGVSSGNFS<br>TSHQLEYIDGK | 881.9115  | 4+ | 12.2     | 18   | y <sub>17</sub> <sup>++</sup> , y <sub>19</sub> <sup>++</sup> , y <sub>20</sub> <sup>++</sup> | 5               | 1, 2, 3, 4     |           | 0.10          | 0.87      |                  |               |
| SEQ   | NIPINLWVNGK                         | 634.3615  | 2+ | 12.5     | 15   | y <sub>7</sub> <sup>+</sup> , y <sub>9</sub> <sup>+</sup> , y <sub>9</sub> <sup>++</sup>      | 1, 2, 3, 4, 5   |                |           | 0.94          | 7.98      | x                |               |
| SEQ   | QNTISTDEVSTQK                       | 725.8546  | 2+ | 5.2      | 21   | y <sub>8</sub> <sup>+</sup> , y <sub>9</sub> <sup>+</sup> , y <sub>11</sub> <sup>+</sup>      | 5               | 1, 2, 3, 4     |           | 0.05          | 0.04      |                  |               |
| SEQ   | YLQNEYNIYGFNK                       | 833.399   | 2+ | 10.4     | 21   | y <sub>5</sub> <sup>+</sup> , y <sub>8</sub> <sup>+</sup> , y <sub>10</sub> <sup>+</sup>      | 1, 2, 3, 4, 5   |                |           | 0.33          | 3.47      |                  |               |
| SEQ   | YMYGGITLANQNLDKPR                   | 651.9999  | 3+ | 9.9      | 15   | y <sub>11</sub> <sup>++</sup> , y <sub>14</sub> <sup>++</sup> , y <sub>15</sub> <sup>++</sup> | 1, 2, 3, 4, 5   |                |           | 1.50          | 5.12      |                  |               |
| SEQ   | YTLYSQFHNEYEAK                      | 896.9125  | 2+ | 8.6      | 21   | y <sub>8</sub> <sup>+</sup> , y <sub>9</sub> <sup>+</sup> , y <sub>10</sub> <sup>+</sup>      | 1, 2, 3, 4, 5   |                |           | 0.02          | 2.22      |                  |               |
| SEQ   | LQGVSSGNFSTSHQLEYIDG<br>K           | 756.3695  | 3+ | 9.6      | 18   | y <sub>16</sub> <sup>++</sup> , y <sub>17</sub> <sup>++</sup> , y <sub>19</sub> <sup>++</sup> | 1, 2, 3, 4      | 5              |           | 0.99          | 1.24      |                  |               |
| SEQ   | NFYANYQPEK                          | 637.296   | 2+ | 7.2      | 18   | y <sub>3</sub> <sup>+</sup> , y <sub>7</sub> <sup>+</sup> , y <sub>8</sub> <sup>+</sup>       | 2               | 1, 3, 4, 5     |           | 0.65          | 1.94      |                  |               |
| SER   | DLVPFIPYK                           | 546.3104  | 2+ | 13.6     | 18   | y <sub>3</sub> <sup>+</sup> , y <sub>6</sub> <sup>+</sup> , y <sub>6</sub> <sup>++</sup>      | 1, 2, 4, 5      |                |           | 2.64          | 4.10      |                  |               |
| SER   | FVNIYGDNK                           | 535.2693  | 2+ | 7.7      | 18   | y <sub>4</sub> <sup>+</sup> , y <sub>5</sub> <sup>+</sup> , y <sub>7</sub> <sup>+</sup>       | 1, 2, 4, 5      |                |           | 5.16          | 1.96      | x                | x             |
| SER   | GTMGNVESLYK                         | 599.7923  | 2+ | 8.3      | 18   | y <sub>5</sub> <sup>+</sup> , y <sub>8</sub> <sup>+</sup> , y <sub>9</sub> <sup>+</sup>       | 1, 2, 4, 5      |                |           | 0.02          | 141.42    |                  |               |
| SER   | NIIVPVTVDNK                         | 606.3533  | 2+ | 10.1     | 15   | y <sub>7</sub> <sup>+</sup> , y <sub>8</sub> <sup>+</sup> , y <sub>9</sub> <sup>+</sup>       | 1, 2, 4, 5      |                |           | 3.84          | 8.19      |                  |               |
| SER   | QFLGHDLIFPIPYSEYK                   | 689.691   | 3+ | 14.47    | 18   | y <sub>6</sub> <sup>+</sup> , y <sub>6</sub> <sup>++</sup> , y <sub>8</sub> <sup>+</sup>      | 1, 2, 5         | 4              |           | 2.43          | 48.26     |                  |               |
| SER   | TVTVQELDYK                          | 598.3139  | 2+ | 8.1      | 18   | y <sub>6</sub> <sup>+</sup> , y <sub>7</sub> <sup>+</sup>                                     | 1, 2, 4,        |                |           | 2.33          | 9.17      | x                | x             |

| Toxin | Peptide             | m/z      | z  | RT (min) | EC % | Fragment<br>s                                             | Variant<br>present      | Variant<br>absent | Commun SE | Peptid<br>e ratio | CV%<br>ratio | Specific<br>peptide | Heavy<br>peptid<br>e |
|-------|---------------------|----------|----|----------|------|-----------------------------------------------------------|-------------------------|-------------------|-----------|-------------------|--------------|---------------------|----------------------|
| SER   | QQFSFTISTNK         | 650.8302 | 2+ | 9.7      | 18   | y <sup>8+</sup> , y <sup>6+</sup> , y <sup>9+</sup>       | 5<br>1, 2, 4, 5         |                   |           | 0.08              | 20.94        |                     |                      |
| SER   | SEFINK              | 369.1951 | 2+ | 3.3      | 18   | y <sup>2+</sup> , y <sup>3+</sup> , y <sup>4+</sup>       | 5<br>1, 2, 4, 5         |                   |           | 1.00              | 0.00         |                     |                      |
| SER   | TIDASSVK            | 410.7242 | 2+ | 2.8      | 15   | y <sup>5+</sup> , y <sup>6+</sup> , y <sup>7++</sup>      | 5<br>1, 2, 4, 5         |                   |           | 0.80              | 27.23        |                     |                      |
| SER   | AVIAENVK            | 422.2504 | 2+ | 4.8      | 15   | y <sup>4+</sup> , y <sup>5+</sup> , y <sup>6+</sup>       | 5<br>1, 2, 4, 5         |                   |           | 9.45              | 3.47         | x                   |                      |
| SER   | NWLTNNK             | 445.23   | 2+ | 5.9      | 18   | y <sup>4+</sup> , y <sup>5+</sup> , y <sup>6+</sup>       | 5<br>1, 2, 4, 5         |                   |           | 0.44              | 2.73         |                     |                      |
| SES   | EPTIQELDLK          | 593.3217 | 2+ | 9.8      | 18   | y <sup>3+</sup> , y <sup>5+</sup> , y <sup>6+</sup>       | 1, 3                    |                   |           | 0.79              | 16.79        |                     |                      |
| SES   | GFMITTDK            | 456.7284 | 2+ | 7.9      | 18   | y <sup>4+</sup> , y <sup>5+</sup> , y <sup>6+</sup>       | 1, 3                    |                   |           | 0.31              | 11.35        |                     |                      |
| SES   | NSIGVNVFK           | 489.2744 | 2+ | 9.1      | 18   | y <sup>2+</sup> , y <sup>6+</sup> , y <sup>7+</sup>       | 1, 3                    |                   |           | 6.92              | 0.19         | x                   |                      |
| SES   | SELDSTALYNIK        | 677.3485 | 2+ | 9.9      | 18   | y <sup>8+</sup> , y <sup>9+</sup> , y <sup>10+</sup>      | 1, 3                    |                   |           | 1.00              | 0.00         | x                   | x                    |
| SES   | TNSTQLLSNDLIFDDITLK | 717.7108 | 3+ | 15.5     | 18   | y <sup>6+</sup> , y <sup>7+</sup> , y <sup>8+</sup>       | 1, 3                    |                   |           | 1.00              | 0.05         |                     |                      |
| SES   | TSYSQDNIILDIK       | 755.3934 | 2+ | 11.3     | 21   | y <sup>5+</sup> , y <sup>8+</sup> , y <sup>10+</sup>      | 1, 3                    |                   |           | 4.70              | 4.69         | x                   |                      |
| SES   | YSVDFLK             | 436.2316 | 2+ | 9.9      | 18   | y <sup>4+</sup> , y <sup>5+</sup> , y <sup>6+</sup>       | 1, 3                    |                   |           | 5.08              | 2.35         | x                   |                      |
| SET   | EGLKDFYSK           | 362.8537 | 3+ | 7        | 15   | y <sup>1+</sup> , y <sup>2+</sup> , y <sup>3+</sup>       | 1                       |                   |           | 0.82              | NR           |                     |                      |
| SET   | FYDGDISK            | 472.7216 | 2+ | 6        | 18   | y <sup>5+</sup> , y <sup>6+</sup> , y <sup>7+</sup>       | 1                       |                   |           | 1.00              | NR           | x                   |                      |
| SET   | INTLDDKILNQFK       | 521.291  | 3+ | 10.9     | 15   | y <sup>9++</sup> , y <sup>11++</sup> , y <sup>12++</sup>  | 1                       |                   |           | 0.63              | NR           |                     |                      |
| SET   | ISHFDIYMEK          | 428.2094 | 3+ | 9        | 15   | y <sup>3+</sup> , y <sup>4+</sup> , y <sup>9++</sup>      | 1                       |                   |           | 0.44              | NR           |                     |                      |
| SET   | IDVYTNK             | 426.7267 | 2+ | 4.4      | 15   | y <sup>4+</sup> , y <sup>5+</sup> , y <sup>6+</sup>       | 1                       |                   |           | 0.05              | NR           |                     |                      |
| SET   | ELEIGNR             | 415.722  | 2+ | 5.1      | 18   | y <sup>3+</sup> , y <sup>4+</sup> , y <sup>6++</sup>      | 1                       |                   |           | 0.06              | NR           |                     |                      |
| SET   | INTLDDK             | 409.7163 | 2+ | 2.5      | 18   | y <sup>2+</sup> , y <sup>5+</sup> , y <sup>6+</sup>       | 1                       |                   |           | 0.25              | NR           |                     |                      |
| SET   | HSPLDKPTNISYR       | 509.9353 | 3+ | 6.7      | 18   | y <sup>5+</sup> , y <sup>11++</sup> , y <sup>12++</sup>   | 1                       |                   |           | 0.55              | NR           | x                   |                      |
| SET   | VGDYVDAWGHIINNKPIGK | 699.369  | 3+ | 11.4     | 18   | y <sup>14++</sup> , y <sup>15++</sup> , y <sup>18++</sup> | 1                       |                   |           | 0.63              | NR           | x                   |                      |
| SEIU  | ASEFTGLMDNMR        | 686.3052 | 2+ | 10.6     | 18   | y <sup>5+</sup> , y <sup>7+</sup> , y <sup>8+</sup>       | 1, 2, 4, 5, 6, 9, 7, 17 |                   |           | 0.93              | 0.84         | x                   |                      |

| Toxin | Peptide      | m/z      | z  | RT (min) | EC % | Fragment s                                          | Variant present                                                                                  | Variant absent                                      | Commun SE | Peptide ratio | CV% ratio | Specific peptide | Heavy peptide |
|-------|--------------|----------|----|----------|------|-----------------------------------------------------|--------------------------------------------------------------------------------------------------|-----------------------------------------------------|-----------|---------------|-----------|------------------|---------------|
| SEIU  | FLQHDLLFK    | 387.5536 | 3+ | 10.3     | 18   | y <sup>1+</sup> , y <sup>2+</sup> , y <sup>8+</sup> | 10, 11<br>1, 2, 4,<br>5, 7, 9,<br>10, 11,<br>17                                                  | 6                                                   |           | 0.04          | 9.01      | x                |               |
| SEIU  | NITAEIDYK    | 597.8037 | 2+ | 7.3      | 18   | y <sup>6+</sup> , y <sup>7+</sup> , y <sup>8+</sup> | 1, 2, 4,<br>5, 6, 7,<br>9, 10,<br>11, 17                                                         |                                                     |           | 1.03          | 2.59      | x                |               |
| SEIU  | YLLIYNDNK    | 578.3059 | 2+ | 9.4      | 18   | y <sup>5+</sup> , y <sup>6+</sup> , y <sup>7+</sup> | 1, 2, 4,<br>5, 6, 7,<br>9, 10,<br>11, 17                                                         |                                                     |           | 1.00          | 0.00      | x                |               |
| SEX   | GNIVINTK     | 429.7558 | 2+ | 5.4      | 18   | y <sup>4+</sup> , y <sup>5+</sup> , y <sup>6+</sup> | 1, 3, 4,<br>5, 7, 9,<br>10, 12,<br>14, 15,<br>16, 17,<br>22, 24,<br>25, 28,<br>34, 36,<br>41, 45 |                                                     |           | 4.69          | 3.11      | x                |               |
| SEX   | NVTFELVK     | 475.2713 | 2+ | 9.8      | 18   | y <sup>2+</sup> , y <sup>5+</sup> , y <sup>6+</sup> | 1, 4, 7,<br>12, 14,<br>17, 22,<br>24, 10, 15,<br>25, 28, 16, 45<br>34, 36,<br>41                 | 3, 5, 9,                                            |           | 2.33          | 3.93      | x                |               |
| SEX   | INLEGTYR     | 483.2562 | 2+ | 7        | 18   | y <sup>4+</sup> , y <sup>5+</sup> , y <sup>6+</sup> | 1, 4, 5,<br>7, 9,<br>12, 14,<br>15, 17,<br>22, 24,<br>25, 28,<br>34, 36,<br>41, 45               |                                                     |           | 7.38          | 7.15      |                  |               |
| SEX   | IHLEGTYTVAGR | 439.5701 | 3+ | 7.6      | 18   | y <sup>3+</sup> , y <sup>4+</sup> , y <sup>5+</sup> | 1, 4, 5,<br>15, 24,<br>25, 28,<br>34, 45                                                         | 3, 7, 9,<br>10, 12,<br>14, 16,<br>17, 22,<br>36, 41 |           | 2.51          | 15.36     |                  |               |
| SEX   | EVVTLK       | 344.7156 | 2+ | 5.2      | 18   | y <sup>2+</sup> , y <sup>3+</sup> , y <sup>4+</sup> | 1, 3, 4,<br>5, 7, 9,<br>10, 12,                                                                  | 17, 41                                              |           | 2.68          | 1.86      |                  |               |

| Toxin | Peptide         | m/z      | z  | RT (min) | EC % | Fragment s                                                                                    | Variant present                                                          | Variant absent                     | Commun SE | Peptide ratio | CV% ratio | Specific peptide | Heavy peptide |
|-------|-----------------|----------|----|----------|------|-----------------------------------------------------------------------------------------------|--------------------------------------------------------------------------|------------------------------------|-----------|---------------|-----------|------------------|---------------|
| SEX   | NWVYSERPLNENQVR | 635.3185 | 3+ | 8.5      | 18   | y <sub>11</sub> <sup>++</sup> , y <sub>12</sub> <sup>++</sup> , y <sub>13</sub> <sup>++</sup> | 14, 15, 16, 22, 24, 25, 28, 34, 36, 45                                   | 10, 34                             |           | 5.49          | 2.57      | x                |               |
| SEX   | ELDHIIR         | 299.1714 | 3+ | 6.4      | 18   | y <sub>3</sub> <sup>+</sup> , y <sub>4</sub> <sup>++</sup> , y <sub>5</sub> <sup>++</sup>     | 14, 15, 16, 17, 22, 24, 25, 34, 36, 41, 45                               | 28                                 |           | 3.27          | 2.73      | x                |               |
| SEX   | INTADIK         | 387.7214 | 2+ | 3.6      | 18   | y <sub>2</sub> <sup>+</sup> , y <sub>5</sub> <sup>+</sup> , y <sub>6</sub> <sup>+</sup>       | 3, 5, 9, 10, 28, 45                                                      | 15, 16, 17, 22, 24, 25, 34, 36, 41 |           | 4.40          | 9.03      |                  |               |
| SEX   | NITLTK          | 351.7109 | 2+ | 3.3      | 18   | y <sub>2</sub> <sup>+</sup> , y <sub>3</sub> <sup>+</sup> , y <sub>4</sub> <sup>+</sup>       | 1, 3, 4, 5, 7, 9, 10, 12, 14, 15, 16, 17, 22, 24, 25, 28, 34, 36, 41, 45 |                                    |           | 1.00          | 0.00      |                  |               |
| SEY   | TVLYNTDYLK      | 615.3243 | 2+ | 9.4      | 18   | y <sub>6</sub> <sup>+</sup> , y <sub>7</sub> <sup>+</sup> , y <sub>8</sub> <sup>+</sup>       | 1, 2, 3, 4, 6, 7                                                         |                                    |           | 3.17          | 4.99      | x                |               |
| SEY   | VNPDSLLEVK      | 557.3111 | 2+ | 10.1     | 18   | y <sub>8</sub> <sup>+</sup> , y <sub>8</sub> <sup>++</sup> , y <sub>9</sub> <sup>++</sup>     | 1, 2, 3, 4, 6, 7                                                         |                                    |           | 5.00          | 2.03      | x                |               |
| SEY   | EVTGVGENYIDVK   | 711.8592 | 2+ | 9.1      | 18   | y <sub>7</sub> <sup>+</sup> , y <sub>8</sub> <sup>+</sup> , y <sub>10</sub> <sup>+</sup>      | 6                                                                        | 1, 2, 3, 4, 7                      |           | 0.99          | 1.44      |                  |               |
| SEY   | YDPISK          | 361.6896 | 2+ | 3.4      | 21   | y <sub>3</sub> <sup>+</sup> , y <sub>4</sub> <sup>+</sup>                                     | 1, 2, 3,                                                                 |                                    |           | 1.08          | 0.29      |                  |               |

| Toxin     | Peptide                         | m/z      | z  | RT (min) | EC % | Fragment<br>s                                          | Variant<br>present | Variant<br>absent | Commun SE | Peptide<br>ratio | CV%<br>ratio | Specific<br>peptide | Heavy<br>peptide |
|-----------|---------------------------------|----------|----|----------|------|--------------------------------------------------------|--------------------|-------------------|-----------|------------------|--------------|---------------------|------------------|
| SEY       | VDTYNVR                         | 433.722  | 2+ | 3.3      | 21   | y <sup>4+</sup> , y <sup>5+</sup> , y <sup>6+</sup>    | 4, 6, 7            |                   |           | 1.00             | 0.00         | x                   |                  |
| SEY       | MNLFVNGHQTK                     | 430.2204 | 3+ | 7.2      | 18   | y <sup>7+</sup> , y <sup>8+</sup> , y <sup>9+</sup>    | 1, 2, 3, 4, 6, 7   |                   |           | 0.15             | 3.79         |                     |                  |
| SEY       | TFDFDNISHIDIYMK                 | 620.2942 | 3+ | 13.8     | 18   | y <sup>12+</sup> , y <sup>13+</sup> , y <sup>14+</sup> | 1, 2, 3, 4, 6, 7   |                   |           | 1.43             | 19.21        |                     |                  |
| SEY       | VTNLSYR                         | 426.7323 | 2+ | 4.3      | 18   | y <sup>3+</sup> , y <sup>5+</sup> , y <sup>6+</sup>    | 1, 2, 3, 4, 6, 7   |                   |           | 1.28             | 2.16         | x                   |                  |
| SEZ       | SSQYTGSWHNIWYLYNSDP<br>VNAK     | 910.7576 | 3+ | 12.9     | 18   | y <sup>5+</sup> , y <sup>8+</sup> , y <sup>9+</sup>    | 1, 2, 3, 5         |                   |           | 0.41             | 1.35         | x                   |                  |
| SEZ       | YLMYR                           | 429.7307 | 2+ | 9.1      | 15   | y <sup>3+</sup> , y <sup>4+</sup> , y <sup>5+</sup>    | 1, 2, 3, 5         |                   |           | 0.77             | 3.55         | x                   |                  |
| SEZ       | IQPIVVK                         | 398.7682 | 2+ | 7.5      | 15   | y <sup>2+</sup> , y <sup>3+</sup> , y <sup>4+</sup>    | 1, 2, 3, 5         |                   |           | 1.00             | 0.00         | x                   |                  |
| SEZ       | INLYHLGGTSYETGYIK               | 643.6633 | 3+ | 10.9     | 18   | y <sup>6+</sup> , y <sup>15+</sup> , y <sup>16+</sup>  | 1, 2, 3, 5         |                   |           | 0.36             | 0.80         | x                   |                  |
| SEZ       | YYWYDMMPPDPGFTQSK               | 1014.929 | 2+ | 14.1     | 18   | y <sup>7+</sup> , y <sup>9+</sup> , y <sup>10+</sup>   | 1, 2, 3, 5         |                   |           | 0.25             | 11.57        | x                   |                  |
| TSST<br>1 | HQLTQIHGLYR                     | 455.9177 | 3+ | 8        | 18   | y <sup>4+</sup> , y <sup>5+</sup> , y <sup>9+</sup>    | 1, 3, 5, 6         | 2, 4              |           | 0.16             | 6.05         |                     |                  |
| TSST<br>1 | LPTPIELPLK                      | 560.8524 | 2+ | 13       | 21   | y <sup>7+</sup> , y <sup>9+</sup>                      | 1, 2, 3, 4, 5, 6   |                   |           | 0.79             | 18.63        | x                   |                  |
| TSST<br>1 | ITMNDGSTYQSDLSK                 | 830.3802 | 2+ | 7.6      | 21   | y <sup>10+</sup> , y <sup>11+</sup> , y <sup>12+</sup> | 1, 2, 3, 4, 5, 6   |                   |           | 1.00             | 0.00         | x                   |                  |
| TSST<br>1 | NTDGSISLIIFSPYYSPAFTK           | 1209.615 | 2+ | 16.5     | 18   | y <sup>5+</sup> , y <sup>11+</sup> , y <sup>12+</sup>  | 1, 3, 6            | 2, 4, 5           |           | 1.08             | 6.79         |                     |                  |
| TSST<br>1 | QLAISTLDFEIR                    | 703.3879 | 2+ | 13.7     | 18   | y <sup>8+</sup> , y <sup>9+</sup> , y <sup>10+</sup>   | 1, 3, 5, 6         | 2, 4              |           | 4.75             | 10.82        | x                   |                  |
| TSST<br>1 | QLAISTLDFK                      | 568.3215 | 2+ | 11.6     | 18   | y <sup>5+</sup> , y <sup>6+</sup> , y <sup>7+</sup>    | 2, 4               | 1, 3, 5, 6        |           | 1.71             | 4.72         | x                   |                  |
| TSST<br>1 | DLLDWYSSGSDAFTNSEVLD<br>NSLGSMR | 993.7819 | 3+ | 16.6     | 18   | y <sup>8+</sup> , y <sup>9+</sup> , y <sup>10+</sup>   | 2, 4, 5            | 1, 3, 6           |           | 0.02             | 8.31         |                     |                  |
| TSST<br>1 | FEYNTEKPPINIDEIK                | 650.6667 | 3+ | 10.96    | 18   | y <sup>9+</sup> , y <sup>13+</sup> , y <sup>14+</sup>  | 1, 2, 3, 4, 5, 6   |                   |           | 0.15             | 6.51         |                     |                  |
| TSST<br>1 | HQLTQTHGLYR                     | 451.9056 | 3+ | 4.2      | 18   | y <sup>4+</sup> , y <sup>9+</sup> , y <sup>10+</sup>   | 2, 4               | 1, 3, 5, 6        |           | 0.22             | 8.13         |                     |                  |

**Figure S1.** Sequence alignment of 24 SE and 164 variants.**SEA**

|     |                                                              |                                   |     |
|-----|--------------------------------------------------------------|-----------------------------------|-----|
| a_2 | MKKRKTAFILTLCLIVIMLVTSPLVNG                                  | SEKSEEIKEKDLHKKSELQGVALDNLQIYYHNG | 60  |
| a_3 | --MKKTAFTLLLFIALTLTTSPLVNG                                   | SEKSEEINEKDLRKKSELQGTALGNLQIYYNE  | 58  |
| a_1 | --MKKTAFTLLLFIALTWTTSPVNG                                    | SEKSEEINEKDLRKKSELQGAALGNLQIYYNE  | 58  |
| a_4 | --MKKTAFTLLLFIALTWTTSPVNG                                    | SEKSEEINEKDLRKKSELQGTALGNLQIYYNE  | 58  |
|     | :*** * * * .: .*****:***:*****.*.***:***:*                   |                                   |     |
| a_2 | KAITENKESDNQFLQHTILFNGFFTDHPWYNDLLVDFDSKVLADKYKGKKVDLYGAYYGY |                                   | 120 |
| a_3 | KAKTENKESHQFLQHTILFKGFFTDHWSYNDLLVDFDSKDIVDKYKGKKVDLYGAYYGY  |                                   | 118 |
| a_1 | KAKTENKESHQFLQHTILFKGFFTNHSYNDLLVDFDSKDIVDKYKGKKVDLYGAYYGY   |                                   | 118 |
| a_4 | KAKTENKESHQFLQHTILFKGFFTNHSYNDLLVDFDSKDIVDKYKGKKVDLYGAYYGY   |                                   | 118 |
|     | ** *****.:*****:***.* *****.:*****:*****                     |                                   |     |
| a_2 | QCAGGTPNKTACMYGGVTLHDNNRLTEEEKVPINLWLDGKQNTVPLETVKTNKKEVTVQE |                                   | 180 |
| a_3 | QCAGGTPNKTACMYGGVTLHDNNRLTEEEKVPINLWLDGKQNTVPLETVKTNKKNVTVQE |                                   | 178 |
| a_1 | QCAGGTPNKTACMYGGVTLHDNNRLTEEEKVPINLWLDGKQNTVPLETVKTNKKNVTVQE |                                   | 178 |
| a_4 | QCAGGTPNKTACMYGGVTLHDNNRLTEEEKVPINLWLDGKQNTVPLETVKTNKKNVTVQE |                                   | 178 |
|     | *****:*****:*****:*****                                      |                                   |     |
| a_2 | LDLQARHYLHGKYNLYNSDTFDGKVQRGLIVFHTSTEPSVNYDLFGAQGQYSNTLLRIYR |                                   | 240 |
| a_3 | LDLQARRYLQEKYNLYNSDVFDGKVQRGLIVFHTSTEPSVNYDLFGAQGQYSNTLLRIYR |                                   | 238 |
| a_1 | LDLQARRYLQEKYNLYNSDVFDGKVQRGLIVFHTSTEPSVNYDLFGAQGQNSNTLLRIYR |                                   | 238 |
| a_4 | LDLQARRYLQEKYNLYNSDVFDGKVQRGLIVFHTSTEPSVNYDLFGAQGQNSNTLLRIYR |                                   | 238 |
|     | *****:*.: *****.***** ***** *****                            |                                   |     |
| a_2 | DNKTINSENMHIDIYLYTT                                          | 259                               |     |
| a_3 | DNKTINSENMHIDIYLYTS                                          | 257                               |     |
| a_1 | DNKTINSENMHIDIYLYTS                                          | 257                               |     |
| a_4 | DNKTINSENMHIDIYLYTS                                          | 257                               |     |
|     | *****:*****:                                                 |                                   |     |

**SEB**

|     |                                                              |                                  |     |
|-----|--------------------------------------------------------------|----------------------------------|-----|
| b_3 | MYNRLFVSRVILIFALILVIYTPNVLA                                  | ESQDPKPDELHKASKFTGLMENMKVLYDDNHV | 60  |
| b_1 | MYKRLFISHVILIFALILVISTPNVLA                                  | ESQDPKPDELHKSSKFTGLMENMKVLYDDNHV | 60  |
| b_2 | MYKRLFISHVILIFVILVISTPNVLA                                   | ESQDPKPDELHKASKFTVLMENMKVLYDDNHV | 60  |
| b_4 | MYKRLFISHVILIFVILVISTPNVLA                                   | ESQDPKPDELHKASKFTGLMENMKVLYDDNHV | 60  |
|     | *.*.*.*.*:*****.***** ***** *****:***** *****                |                                  |     |
| b_3 | SAINVKSIDQFLYFDLIYSIKDTKLGNYDNVRVEFKNKDLADKYKDKYVDVFGANYYYQC |                                  | 120 |
| b_1 | SAINVKSIDQFLYFDLIYSIKDTKLGNYDNVRVEFKNKDLADKYKDKYVDVFGANYYYQC |                                  | 120 |
| b_2 | SAINVKSIDQFLYFDLIYSIKDTKLGNYDNVRVEFKNKDLADKYKDKYVDVFGANYYYQC |                                  | 120 |
| b_4 | SAINVKSIDQFLYFDLIYSIKDTKLGNYDNVRVEFKNKDLADKYKDKYVDVFGANYYYQC |                                  | 120 |
|     | *****                                                        |                                  |     |
| b_3 | YFSKKTNDINSHQTDKRKTCMYGGVTEHNGNQLDKYRSITVRVFEDGKNLLSFDVQTNKK |                                  | 180 |
| b_1 | YFSKKTNDINSHQTDKRKTCMYGGVTEHNGNQLDKYRSITVRVFEDGKNLLSFDVQTNKK |                                  | 180 |
| b_2 | YFSKKTNDINSHQTDKRKTCMYGGVTEHNGNQLDKYRSITVRVFEDGKNLLSFDVQTNKK |                                  | 180 |
| b_4 | YFSKKTNDINSHQTDKRKTCMYGGVTEHNGNQLDKYRSITVRVFEDGKNLLSFDVQTNKK |                                  | 180 |
|     | *****:*****:*****                                            |                                  |     |
| b_3 | KVTAQELDYLTRHYLVKNKKLYEFNNSPYETGYIKFIESENSFWYDMMAPGDKFDQSKY  |                                  | 240 |
| b_1 | KVTAQELDYLTRHYLVKNKKLYEFNNSPYETGYIKFIESENSFWYDMMAPGDKFDQSKY  |                                  | 240 |
| b_2 | KVTAQELDYLTRHYLVKNKKLYEFNNSPYETGYIKFIESENSFWYDMMAPGDKFDQSKY  |                                  | 240 |
| b_4 | KVTAQELDYLTRHYLVKNKKLYEFNNSPYETGYIKFIESENSFWYDMMAPGDKFDQSKY  |                                  | 240 |
|     | *****:*****:*****                                            |                                  |     |
| b_3 | LMMYNDNKLVDSDKVKIEVYLTTKKK                                   | 266                              |     |
| b_1 | LMMYNDNKMVDSKDVKIEVYLTTKKK                                   | 266                              |     |
| b_2 | LMMYNDNKLVDSDKVKIEVYLTTKKK                                   | 266                              |     |
| b_4 | LMMYNDNKLVDSDKVKIEVYLTTKKK                                   | 266                              |     |



\*\*\*\*\*:\*\*\*\*\*

# SEC

|      |                                                             |                                   |     |
|------|-------------------------------------------------------------|-----------------------------------|-----|
| c_10 | MNKSRLFISCVILIFALILVLFTPNVLA                                | ESQPDPTPDELHKSSEFTGTMGNMKYLYDDHYV | 60  |
| c_5  | MYKRLFISRVILIFALILVISTPNVLA                                 | ESQPDMPDDLHKSSEFTGTMGNMKYLYDDHYV  | 60  |
| c_11 | MNKSRLFISCVILIFALILVLFTPNVLA                                | ESQPDPTPDELHKSSEFTGTMGNMKYLYDDHYV | 60  |
| c_3  | MNKSRLFISCVILIFALILVLFTPNVLA                                | ESQPDPTPDELHKSSEFTGTMGNMKYLYDDHYV | 60  |
| c_4  | MNKSRLFISCVILIFALILVLFTPNVLA                                | ESQPDPTPDELHKSSEFTGTMGNMKYLYDDHYV | 60  |
| c_2  | MNKSRLFISCVILIFSLILVLFTPNVLA                                | ESQPDPTPDELHKSSEFTGTMGNMKYLYDDHYV | 60  |
| c_1  | MNKSRLFISCVILIFALILVLFTPNVLA                                | ESQPDPTPDELHKSSEFTGTMGNMKYLYDDHYV | 60  |
| c_13 | MNKSRLFISCVILIFALILVLFTPNVLA                                | ESQPDPTPDELHKSSEFTGTMGNMKYLYDDHYV | 60  |
| c_7  | MNKSRLFISCVILIFALILVLFTPNVLA                                | ESQPDPTPDELHKSSEFTGTMGNMKYLYDDHYV | 60  |
| c_8  | MNKSRLFISCVILIFALILVLFTPNVLA                                | ESQPDPTPDELHKSSEFTGTMGNMKYLYDDHYV | 60  |
|      | * * * * * : * * * * * : * * * * * : * * * * * : * * * * *   |                                   |     |
| c_10 | SATKVMVDKFLAHDLIYNISDKKLKNYDIVKTELLNEDLAKKYKDEVVDVYGSNYYVNC |                                   | 120 |
| c_5  | SATKVMVDKFLAHDLIYNISDKKLKNYDIVKTELLNEDLAKKYKDEVVDVYGSNYYVNC |                                   | 120 |
| c_11 | SATKVMVDKFLAHDLIYNISDKKLKNYDIVKTELLNEDLAKKYKDEVVDVYGSNYYVNC |                                   | 120 |
| c_3  | SATKVMVDKFLAHDLIYNISDKKLKNYDIVKTELLNEDLAKKYKDEVVDVYGSNYYVNC |                                   | 120 |
| c_4  | SATKVMVDKFLAHDLIYNISDKKLKNYDIVKTELLNEDLAKKYKDEVVDVYGSNYYVNC |                                   | 120 |
| c_2  | SATKVMVDKFLAHDLIYNISDKKLKNYDIVKTELLNEDLAKKYKDEVVDVYGSNYYVNC |                                   | 120 |
| c_1  | SATKVMVDKFLAHDLIYNISDKKLKNYDIVKTELLNEDLAKKYKDEVVDVYGSNYYVNC |                                   | 120 |
| c_13 | SATKVMVDKFLAHDLIYNISDKKLKNYDIVKTELLNEDLAKKYKDEVVDVYGSNYYVNC |                                   | 120 |
| c_7  | SATKVMVDKFLAHDLIYNISDKKLKNYDIVKTELLNEDLAKKYKDEVVDVYGSNYYVNC |                                   | 120 |
| c_8  | SATKVMVDKFLAHDLIYNISDKKLKNYDIVKTELLNEDLAKKYKDEVVDVYGSNYYVNC |                                   | 120 |
|      | ***** : ***** : ***** : ***** : *****                       |                                   |     |
| c_10 | YFSSKDNVGKVTGGKTCMYGGITKHEGNHFDNGNLQNVLRVYENKRNTISFEVQTDKKS |                                   | 180 |
| c_5  | YFSSKDNVGKVTGGKTCMYGGITKHEGNHFDNGNLQNVLRVYENKRNTISFEVQTDKKS |                                   | 180 |
| c_11 | YFSSKDNVGKVTGGKTCMYGGITKHEGNHFDNGNLQNVLRVYENKRNTISFEVQTDKKS |                                   | 180 |
| c_3  | YFSSKDNVGKVTGGKTCMYGGITKHEGNHFDNGNLQNVLRVYENKRNTISFEVQTDKKS |                                   | 180 |
| c_4  | YFSSKDNVGKVTGGKTCMYGGITKHEGNHFDNGNLQNVLRVYENKRNTISFEVQTDKKS |                                   | 180 |
| c_2  | CFSSKDNVGKVTGGKTCMYGGITKHEGNHFDNGNLQNVLRVYENKRNTISFEVQTDKKS |                                   | 180 |
| c_1  | YFSSKDNVGKVTGGKTCMYGGITKHEGNHFDNGNLQNVLRVYENKRNTISFEVQTDKKS |                                   | 180 |
| c_13 | YFSSKDNVGKVTGGKTCMYGGITKHEGNHFDNGNLQNVLRVYENKRNTISFEVQTDKKS |                                   | 180 |
| c_7  | YFSSKDNVGKVTGGKTCMYGGITKHEGNHFDNGNLQNVLRVYENKRNTISFEVQTDKKS |                                   | 180 |
| c_8  | YFSSKDNVGKVTGGKTCMYGGITKHEGNHFDNGNLQNVLRVYENKRNTISFEVQTDKKS |                                   | 180 |
|      | ***** : ***** : ***** : ***** : *****                       |                                   |     |
| c_10 | VTAQELDIKARNFLINKKNLYEFNSSPYETGYIKFIENNGNTFWYDMPAPGDKFDQSKY |                                   | 240 |
| c_5  | VTAQELDIKARNFLINKKNLYEFNSSPYETGYIKFIENNGNTFWYDMPAPGDKFDQSKY |                                   | 240 |
| c_11 | VTAQELDIKARNFLINKKNLYEFNSSPYETGYIKFIENNGNTFWYDMPAPGDKFDQSKY |                                   | 240 |
| c_3  | VTAQELDIKARNFLINKKNLYEFNSSPYETGYIKFIENNGNTFWYDMPAPGDKFDQSKY |                                   | 240 |
| c_4  | VTAQELDIKARNFLINKKNLYEFNSSPYETGYIKFIENNGNTFWYDMPAPGDKFDQSKY |                                   | 240 |
| c_2  | VTAQELDIKARSFLINKKNLYEFNSSPYETGYIKFIENNGNTFWYDMPAPGDKFDQSKY |                                   | 240 |
| c_1  | VTAQELDIKARNFLINKKNLYEFNSSPYETGYIKFIENNGNTFWYDMPAPGDKFDQSKY |                                   | 240 |
| c_13 | VTAQELDIKARNFLINKKNLYEFNSSPYETGYIKFIENNGNTFWYDMPAPGDKFEQSKY |                                   | 240 |
| c_7  | VTAQELDIKARNFLINKKNLYEFNSSPYETGYIKFIENNGNTFWYDMPAPGDKFDQSKY |                                   | 240 |
| c_8  | VTAQELDIKARNFLINKKNLYEFNSSPYETGYIKFIENNGNTFWYDMPAPGDKFDQSKY |                                   | 240 |
|      | ***** : ***** : ***** : ***** : *****                       |                                   |     |
| c_10 | LMMYNDNKTVDSTQFHLDEISKR--                                   | 264                               |     |
| c_5  | LMMYNDNKTVDSSKSVKIEVHLTTKNG                                 | 266                               |     |
| c_11 | LMMYNDNKTVDSSKSVKIEVHLTTKNG                                 | 266                               |     |
| c_3  | LMMYNDNKTVDSSKSVKIEVHLTTKNG                                 | 266                               |     |
| c_4  | LMMYNDNKTVDSSKSVKIEVHLTTKNG                                 | 266                               |     |
| c_2  | LMMYNDNKTVDSSKSVKIEVHLTTKNG                                 | 266                               |     |
| c_1  | LMMYNDNKTVDSSKSVKIEVHLTTKNG                                 | 266                               |     |
| c_13 | LMMYNDNKTVDSSKSVKIEVHLTTKNG                                 | 266                               |     |
| c_7  | LMMYNDNKTVDSSKSVKIEVHLTTKNG                                 | 266                               |     |
| c_8  | LMMYNDNKTVDSSKSVKIEVHLTTKNG                                 | 266                               |     |
|      | ***** : ***** : ***** : ***** : *****                       |                                   |     |

## SED

|             |                                                              |     |
|-------------|--------------------------------------------------------------|-----|
| d_5         | MKKFNILIALFFFTSLVISPLNVKANENIDSVKEKELHKKSELSSTALNNMKHSYADKNP | 60  |
| d_3         | MKKFNILIALFFFTSLVISPLNVKANENIDSVKEKELHKKSELSSTALNNMKHSYADKNP | 60  |
| d_1         | MKKFNILIALFFFTSLVISPLNVKANENIDSVKEKELHKKSELSSTALNNMKHSYADKNP | 60  |
| d_2         | MKKFNILIALFFFTSLVISPLNVKANENIDSVKEKELHKKSELSSTALNNMKHSYADKNP | 60  |
| *****       |                                                              |     |
| d_5         | IIGENKSTGDQFLENTLLYKNFFTDLINFEDLLINFNSKEMAHFKSKNVDVYAIRYSIN  | 120 |
| d_3         | IIGENKSTGDQFLENTLLYKKFFTDLINFEDLLINFNSKEMAHFKSKNVDVYAIRYSIN  | 120 |
| d_1         | IIGENKSTGDQFLENTLLYKKFFTDLINFEDLLINFNSKEMAHFKSKNVDVYAIRYSIN  | 120 |
| d_2         | IIGENKSTGDQFLENTLLYKKFFTDLINFEDLLINFNSKEMAHFKSKNVDVYAIRYSIN  | 120 |
| *****:***** |                                                              |     |
| d_5         | CYGGEIDKTACTYGGVTPHEGNKLKERKKIPINLWINGVQKEVSLDKVQTDKKNVTVQEL | 180 |
| d_3         | CYGGEIDKTACTYGGVTPHEGNKLKERKKIPINLWINGVQKEVSLDKVQTDKKNVTVQEL | 180 |
| d_1         | CYGGEIDKTACTYGGVTPHEGNKLKERKKIPINLWINGVQKEVSLDKVQTDKKNVTVQEL | 180 |
| d_2         | CYGGEIDRTACTYGGVTPHEGNKLKERKKIPINLWINGVQKEVSLDKVQTDKKNVTVQEL | 180 |
| *****:***** |                                                              |     |
| d_5         | DAQARRYLQKDLKLYNNDTLGGKIQRGKIEFDSSDGSKVSYDLFDVKGDFPEKQLRIYSD | 240 |
| d_3         | DAQARRYLQKDLKLYNNDTLGGKIQRGKIEFDSSDESXVSYDLFDVKGDFPEKQLRIYSD | 240 |
| d_1         | DAQARRYLQKDLKLYNNDTLGGKIQRGKIEFDSSDGSKVSYDLFDVKGDFPEKQLRIYSD | 240 |
| d_2         | DAQARRYLQKDLKLYNNDTLGGKIQRGKIEFDSSDGSKVSYDLFDVKGDFPEKQLRIYSD | 240 |
| ***** ***** |                                                              |     |
| d_5         | NKTLSTEHLHIDIYLYEK                                           | 258 |
| d_3         | NKTLSTEHLHIDIYLYEK                                           | 258 |
| d_1         | NKTLSTEHLHIDIYLYEK                                           | 258 |
| d_2         | NKTLSTEHLHIDIYLYEK                                           | 258 |
| *****       |                                                              |     |

## SEE

|             |                                                              |     |
|-------------|--------------------------------------------------------------|-----|
| e_1         | MKKTAFILLLFIALTLTTSPLVNGSEKSEEINEKDLRKKSELQRNALSNLRQIYYYNEKA | 60  |
| e_2         | MKKTAFILLLFIALTLTTSPLVNGSEKSEEINEKDLRKKSELQGIALSNLRQIYYYNEKA | 60  |
| e_3         | MKKTAFILLLFIALTLTTSPLVNGSEKSEEINEKDLRKKSELQGTALSNLRQIYYYNEKA | 60  |
| ***** ***** |                                                              |     |
| e_1         | ITENKESDDQFLENTLLFKGFFTGHWPYNDLLVDLGSKDATNKYKGKKVDLYGAYYGYQC | 120 |
| e_2         | ITENKESDDQFLENTLLFKDFFTGHWPYNDLLVDLGSKDATNKYKGKKVDLYGAYYGYQC | 120 |
| e_3         | ITENKESDDQFLENTLLFKDFFTGHWPYNDLLVDLGSKDATNKYKGKKVDLYGAYYGYQC | 120 |
| *****.***** |                                                              |     |
| e_1         | AGGTPNKTACMYGGVTLHDNNRLTEEKKVPINLWIDGKQTTVPIDKVKTSKKEVTVQELD | 180 |
| e_2         | AGGTPNKTACMYGGVTLHDNNRLTEEKKVPINLWIDGKQTTVPIDKVKTSKKEVTVQELD | 180 |
| e_3         | AGGTPNKTACMYGGVTLHDNNRLTEEKKVPINLWIDGKQTTVPIDKVKTSKKEVTVQELD | 180 |
| *****       |                                                              |     |
| e_1         | LQARHYLHGKFLYNSDSFGGKVQRGLIVFHSSEGSTVSYDLFDAQQQYPTLLRIYRDN   | 240 |
| e_2         | LQARHYLHEKFLYNSDSFGGKVQRGLIVFHPSEGSTVSYDLFDAQQQYPTLLRIYRDN   | 240 |
| e_3         | LQARHYLHEKFLYNSDSFGGKVQRGLIVFHSSEGSTVSYDLFDAQQQYPTLLRIYRDN   | 240 |
| ***** ***** |                                                              |     |
| e_1         | KTINSENHIDLYLYTT                                             | 257 |
| e_2         | KTINSENHIDLYLYTT                                             | 257 |
| e_3         | KTINSENHIDLYLYTT                                             | 257 |
| *****       |                                                              |     |



## SEH

|         |                                                              |                                      |     |
|---------|--------------------------------------------------------------|--------------------------------------|-----|
| h_1     | MINKIKILFSFLALLLSFTSYAKA                                     | EDLHDKSELTDLALANAYGQYNHPFIKENIKSDEIS | 60  |
| h_4     | MINKIKILFSFLALLLSFTSYAKA                                     | EDLHDKSELTDLALANAYGQYNHPFIKENIKSDEIS | 60  |
| h_2     | MINKIKILFSFLALLLSFTSYAKA                                     | EDLHDKSELTDLALANAYGQYNHPFIKENIKSDEIS | 60  |
| h_3     | MINKIKILFSFLALLLSFTSYAKA                                     | EDLHDKSELTDLALANAYGQYNHPFIKENIKSDEIS | 60  |
| *****   |                                                              |                                      |     |
| h_1     | GEKDLIFRNQGDGNDLRVKFATADLAQKFKNKSVDIYGASFYYKCEKISENISECLYGG  |                                      | 120 |
| h_4     | GEKDLIFRNQGDGNDLRVKFATADLAQKFKNKSVDIYGASFYYKCEKISENISECLYGG  |                                      | 120 |
| h_2     | GEKDLIFRNQGDGNDLRVKFATADLAQKFKNKSVDIYGASFYYKCEKISENISECLYGG  |                                      | 120 |
| h_3     | GEKDLIFRNQGDGNDLRVKFATADLAQKFKNKSVDIYGASFYYKCEKISENISECLYGG  |                                      | 120 |
| *****   |                                                              |                                      |     |
| h_1     | TTLNSEKLAQERVIGANVWVDGIQKETELIRTNKKNVTLQELDIKIRKILSDKYKIYYKD |                                      | 180 |
| h_4     | TTLNSEKLAQERVIGANVWVDGIQKETELIRTNKKNVTLQELDIKIRKILSDKYKIYYKD |                                      | 180 |
| h_2     | TTLNSEKLAQERVIGANVWVDGIQKETELIRTNKKNVTLQELDIKIRKILSDKYKIYYKD |                                      | 180 |
| h_3     | TTLNSEKLAQERAIGANVWVDGIQKETELIRTNKKNVTLQELDIKIRKILSDKYKIYYKD |                                      | 180 |
| * ***** |                                                              |                                      |     |
| h_1     | SEISKGLIEFDMKTPRDYSFDIYDLKGENDYEIDKIYEDNKTLKSDDISHIDVNLYTKKS |                                      | 240 |
| h_4     | SEISKGLIEFDMKTPRDYSFDIYDLKGENDYEIDKIYEDNKTLKSDDISHIDVNLYTKKS |                                      | 240 |
| h_2     | SEISKGLIEFDMKTPRDYSFDIYDLKGENDYEIDKIYEDNKTLKSDDISHIDVNLYTKKS |                                      | 240 |
| h_3     | SEISKGLIEFDMKTPRDYSFDIYDLKGENDYEIDKIYEDNKTLKSDDISHIDVNLYTKKS |                                      | 240 |
| *****   |                                                              |                                      |     |
| h_1     | IINENF                                                       | 246                                  |     |
| h_4     | V-----                                                       | 241                                  |     |
| h_2     | V-----                                                       | 241                                  |     |
| h_3     | V-----                                                       | 241                                  |     |
| :       |                                                              |                                      |     |

## SEI

|                                         |                                                             |                                      |     |
|-----------------------------------------|-------------------------------------------------------------|--------------------------------------|-----|
| i_2                                     | MKKFKYSFIVVFILFFNVNDFSIA                                    | QGDIGVGNLNRFYTKHDYIDLKGLIDKNLPSANQLE | 60  |
| i_12                                    | MKKFKYSFIVVFILFFNVNDFSIA                                    | QGDIGVGNLNRFYTKHDYIDLKGLIDKNLPSANQLE | 60  |
| i_6                                     | MKKFKYSFILVFILFFNIKDLTYA                                    | QGDIGVGNLNRFYTKHDYIDLKGVTDKNLPIANQLE | 60  |
| i_15                                    | MKKFKYSFILVFILFFNIKDLTYA                                    | QGDIGVGNLNRFYTKHDYIDLKGVTDKNLPIANQLE | 60  |
| i_3                                     | MKKFKYSFILVFILFFNIKDLTYA                                    | QGDIGVGNLNRFYTKHDYIDLKGVTDKNLPIANQLE | 60  |
| i_4                                     | MKKFKYSFILVFILFFNIKDLTYA                                    | QGDIGVGNLNRFYTKHDYIDLKGVTDKNLPIANQLE | 60  |
| i_8                                     | MKKFKYSFIVVFILFFNVYDLSIA                                    | QGDIGVGNLNRFYTKYDYIDLKGVTDKNLPTANQLE | 60  |
| i_11                                    | MKKFKYSFIVVFILFFNVYDLSIA                                    | QGDIGVGNLNRFYTKYDYIDLKGVTDKNLPTANQLE | 60  |
| i_13                                    | MKKFKYSFIVVFILFFNVNDFSIA                                    | QGDIGVGNLNRFYTKYDYIDLKGVTDKNLPIANQLE | 60  |
| i_17                                    | MKKFKYSFIVVFILFFNVDDLTYA                                    | QGDIGVGNLNRFYTKYDYIDLKGVTDKNLPIANQLE | 60  |
| i_1                                     | MKKIKYSFILVFILFFNIKDLTYA                                    | QGDIGVGNLNRFYTKYDYIDLKGVTDKNLPIANQLE | 60  |
| i_5                                     | MKKIKYSFILVFILFFNIKDLTYA                                    | QGDIGVGNLNRFYTKYDYIDLKGVTDKNLPIANQLE | 60  |
| i_10                                    | MKKIKYSFILFFILFFNIKDLTYA                                    | QGDIGVGNLNRFYTKYDYIDLKGVTDKNLPIANQLE | 60  |
| ***:*****:***:***: *:*****:*****: ***** |                                                             |                                      |     |
| i_2                                     | FSTGTNDLISESNNWDEISKFKGKKLDIFGIDYNGPCKSKYMYGGATLSGQYLSARKIP |                                      | 120 |
| i_12                                    | FSTGTNDLISESNNWDEISKFKGKKLDIFGIDYNGPCKSKYMYGGATLSGQYLSARKIP |                                      | 120 |
| i_6                                     | FSTGTNDLISESNNWDEISKFKGKKLDIFGIDYNGPCKSKYMYGGATLSGQYLSARKIP |                                      | 120 |
| i_15                                    | FSTGTNDLISESNNWDEISKFKGKKLDIFGIDYNGPCKSKYMYGGATLSGQYLSARKIP |                                      | 120 |
| i_3                                     | FSTGTNDLISESNNWDEISKFKGKKLDIFGIDYNGPCKSKYMYGGATLSGQYLSARKIP |                                      | 120 |
| i_4                                     | FSTGTNDLISESNNWDEISKFKGKKLDIFGIDYNGPCKSKYMYGGATLSGQYLSARKIP |                                      | 120 |
| i_8                                     | FSTGTNDLISESNNWDEISKFKGKKLDIFGIDYNGPCKSKYMYGGATLSGQYLSARKIP |                                      | 120 |
| i_11                                    | FSTGTNDLISESNNWDEISKFKGKKLDIFGIDYNGPCKSKYMYGGATLSGQYLSARKIP |                                      | 120 |
| i_13                                    | FSTGTNDLISESNNWDEISKFKGKKLDIFGIDYNGPCKSKYMYGGATLSGQYLSARKIP |                                      | 120 |
| i_17                                    | FSTGTNDLISESNNWDEISKFKGKKLDIFGIDYNGPCKSKYMYGGATLSGQYLSARKIP |                                      | 120 |
| i_1                                     | FSTGTNDLISESNNWDEISKFKGKKLDIFGIDYNGPCKSKYMYGGATLSGQYLSARKIP |                                      | 120 |
| i_5                                     | FSTGTNDLISESNNWDEISKFKGKKLDIFGIDYNGPCKSKYMYGGATLSGQYLSARKIP |                                      | 120 |
| i_10                                    | FSTGTNDLISESNNWDEISKFKGKKLDIFGIDYNGPCKSKYMYGGATLSGQYLSARKIP |                                      | 120 |

|                             |                                                             |     |
|-----------------------------|-------------------------------------------------------------|-----|
| ***.*****:*****:***:*.***** |                                                             |     |
| i_2                         | INLWVNGKHKTISTDKIATNKKLVTAQEIDVKLRRLQEEYNIYGHNSTGKGKEYGYKSK | 180 |
| i_12                        | INLLVNGKHKTISTDKIATNKKLVTAQEIDVKLRRLQEEYNIYGHNSTGKGKEYGYKSK | 180 |
| i_6                         | INLWVNGKHKTISTDKIATNKKLVTAQEIDVKLRRLQEEYNIY-----            | 165 |
| i_15                        | INLWVNGKHKTISTDKIATNKKLVTAQEIDVKLRRLQEEYNIYGHNSTGKGKEYGYKSK | 180 |
| i_3                         | INLWVNGKHKTISTDKIATNKKLVTAQEIDVKLRRLQEEYNIYGHNSTGKGKEYGYKSK | 180 |
| i_4                         | INLWVNGKHKTISTDKIATNKKLVTAQEIDVKLRRLQEEYNIYGHNSTGKGKEYGYKSK | 180 |
| i_8                         | INLWVNGKHKTISTDKIATNKKLVTAQEIDVKLRRLQEEYNIYGHNSTGKGKEYGYKSK | 180 |
| i_11                        | INLWVNGKHKTISTDKIATNKKLVTAQEIDVKLRRLQEEYNIYGHNSTGKGKEYGYKSK | 180 |
| i_13                        | INLWVNGKHKTISTDKIATNKKLVTAQEIDVKLRRLQEEYNIYGHNSTGKGKEYGYKSK | 180 |
| i_17                        | INLWVNGKHKTISTDKIATNKKLVTAQEIDVKLRRLQEEYNIYGHNSTGKGKEYGYKSK | 180 |
| i_1                         | INLWVNGKHKTISTDKIATNKKLVTAQEIDVKLRRLQEEYNIYGHNSTGKGKEYGYKSK | 180 |
| i_5                         | INLWVNGKHKTISTDKIATNKKLVTAQEIDVKLRRLQEEYNIYGHNNNGKGKEYGYKSK | 180 |
| i_10                        | INLWVNGKHKTISTDKIATNKKLVTAQEIDVKLRRLQEEYNIYGHNNNGKGKEYGYKSK | 180 |
| ***.*****:*****:*****       |                                                             |     |
| i_2                         | FYSGFNKGKVLFHLNDEKSFSDLFYTGDPVPSFLKIYEDNKIIIESEKFHLDVEISYVD | 240 |
| i_12                        | FYSGFNKGKVLFHLNDEKSFSDLFYTGDPVPSFLKIYEDNKIIIESEKFHLDVEISYVD | 240 |
| i_6                         | -----GDGLPVSFLKIYEDNKIIIESEKFHLDVEISYVD                     | 198 |
| i_15                        | FYSGFNKGKVLFHLNDEKSFSDLFYTGDPVPSFLKIYEDNKIIIESEKFHLDVEISYVD | 240 |
| i_3                         | FYSGFNKGKVLFHLNDEKSFSDLFYTGDPVPSFLKIYEDNKIIIESEKFHLDVEISYVD | 240 |
| i_4                         | FYSGFNKGKVLFHLNDEKSFSDLFYTGDPVPSFLKIYEDNKIIIESEKFHLDVEISYVD | 240 |
| i_8                         | FYSGFNKGKVLFHLNDEKSFSDLFYTGDPVPSFLKIYEDNKIIIESEKFHLDVEISYVD | 240 |
| i_11                        | FYSGFNKGKVLFHLNDEKSFSDLFYTGDPVPSFLKIYEDNKIIIESEKFHLDVEISYVD | 240 |
| i_13                        | FYSGFNKGKVLFHLNDEKSFSDLFYTGDPVPSFLKIYEDNKIIIESEKFHLDVEISYVD | 240 |
| i_17                        | FYSGFNKGKVLFHLNDEKSFSDLFYTGDPVPSFLKIYEDNKIIIESEKFHLDVEISYVD | 240 |
| i_1                         | FYSGFNKGKVLFHLNDEKSFSDLFYTGDPVPSFLKIYEDNKIIIESEKFHLDVEISYVD | 240 |
| i_5                         | FYSGFNKGKVLFHLNDEKSFSDLFYTGDPVPSFLKIYEDNKIIIESEKFHLDVEISYVD | 240 |
| i_10                        | FYSGFNKGKVLFHLNDEKSFSDLFYTGDPVPSFLKIYEDNKIIIESEKFHLDVEISYVD | 240 |
| ***:***:*****               |                                                             |     |
| i_2                         | SNK                                                         | 243 |
| i_12                        | SNK                                                         | 243 |
| i_6                         | SN-                                                         | 200 |
| i_15                        | SN-                                                         | 242 |
| i_3                         | SN-                                                         | 242 |
| i_4                         | SN-                                                         | 242 |
| i_8                         | SN-                                                         | 242 |
| i_11                        | SN-                                                         | 242 |
| i_13                        | SN-                                                         | 242 |
| i_17                        | SN-                                                         | 242 |
| i_1                         | SN-                                                         | 242 |
| i_5                         | SN-                                                         | 242 |
| i_10                        | SN-                                                         | 242 |
| **                          |                                                             |     |

SEJ

|       |                                                              |     |
|-------|--------------------------------------------------------------|-----|
| sej_4 | MKKTIFILIFSLTLLITPLVYSDSKNETIKEKNLHKKSELSSITLNNLRHIYFFNEKG   | 60  |
| sej_2 | MKKRIFILIFSLTLLITPLVYSDSKNETIKEKNLHKKSELSSITLNNLRHIYFFNEKG   | 60  |
| sej_1 | MKKTIFILIFSLTLLITPLVYSDSKNETIKEKNLHKKSELSSITLNNLRHIYFFNEKG   | 60  |
| sej_3 | MKKTIFILIFSLTLLITPLVYSDSKNETIKEKNLHKKSELSSITLNNLRHIYFFNEKG   | 60  |
|       | ***                                                          |     |
| sej_4 | ISEKIMTEDQFLDYTLFLKSFESHQSQYNDLLVQFDSKETVNKFKGKQVDLYGSYYGFQC | 120 |
| sej_2 | ISEKIMTEDQFLDYTLFLKSFESHQSQYNDLLVQFDSKETVNKFKGKQVDLYGSYYGFQC | 120 |
| sej_1 | ISEKIMTEDQFLDYTLFLKSFESHQSQYNDLLVQFDSKETVNKFKGKQVDLYGSYYGFQC | 120 |
| sej_3 | ISEKIMTEDQFLDYTLFLKSFESHQSQYNDLLVQFDSKETVNKFKGKQVDLYGSYYGFQC | 120 |
|       | *****                                                        |     |
| sej_4 | SGGKSNKTACMYGGVTLHENNQLYDTKKIPINLWIDSIRTVVPLDIVKTNKKKVTIQELD | 180 |
| sej_2 | SGGKPNKTACMYGGVTLHENNQLYDTKKIPINLWIDSIRTVVPLDIVKTNKKKVTIQELD | 180 |
| sej_1 | SGGKPNKTACMYGGVTLHENNQLYDTKKIPINLWIDSIRTVVPLDIVKTNKKKVTIQELD | 180 |
| sej_3 | SGGKPNKTACMYGGVTLHENNQLYDTKKIPINLWIDSIRTVVPLDIVKTNKKKVTIQELD | 180 |
|       | *****                                                        |     |
| sej_4 | LQARYYLHKQYNLYNPSTFDGKIQKGLIVFHTSKEPLVSYDLFNVIGQYPDKLLKIYQDN | 240 |
| sej_2 | LQARYYLHKQYNLYNPSTFDGKIQKGLIVFHTSKEPLVSYDLFNVIGQYPDKLLKIYQDN | 240 |
| sej_1 | LQARYYLHKQYNLYNPSTFDGKIQKGLIVFHTSKEPLVSYDLFNVIGQYPDKLLKIYQDN | 240 |
| sej_3 | LQARYYLHKQYNLYNPSTFDGKIQKGLIVFHTSKEPLVSYDLFNVIGQYPDKLLKIYQDN | 240 |
|       | *****                                                        |     |
| sej_4 | KIIESENMHIDIYLYTSLIVLISLPLVL                                 | 268 |
| sej_2 | KIIESENMHIDIYLYTSLIVLISLPLVL                                 | 268 |
| sej_1 | KIIESENMHIDIYLYTSLIVLISLPLVL                                 | 268 |
| sej_3 | KIIESENMHIDIYLYTSLIVLISLPLVL                                 | 268 |
|       | *****                                                        |     |

## SEK

|     |                                                               |    |
|-----|---------------------------------------------------------------|----|
| k_2 | MKKLISILLINIIILGVSNNASAQGDIGIDNLRNFYTKKDFINLKDVKDNDTPIANQLQF  | 60 |
| k_9 | MKKLISILLINIIILGVSNNASAQGDIGIDNLRNFYTKKDFINLKDVKDNDTPIANQLQF  | 60 |
| k_7 | MKKLIVIIILINIITLSVNSASAQGDIGIDNLRNFYTKKDFVLDKDVKDNDTPIANQLQF  | 60 |
| k_4 | MKKLISILLINIIILGVSNSASAQGDIGIDNLRNFYTKKDFIDLDKDVKDNDTPIANQLQF | 60 |
| k_1 | MKKLISILLINIIILGVSNSASAQGDIGIDNLRNFYTKKDFVLDKDVKDNDTPIANQLQF  | 60 |
| k_3 | MKKLISILLINIIILGVSNSASAQGDIGIDNLRNFYTKKDFVLDKDVKDNDTPIANQLQF  | 60 |
| k_5 | MKKLISILLINIIILGVSNNASAQGDIGIDNLRNFYTKKDFVLDKDVKDNDTPIANQLQF  | 60 |
| k_8 | MKKLISILLINIIILGVSNNASAQGDIGIDNLRNFYTKKDFVLDKDVKDNDTPIANQLQF  | 60 |

|                                 |                                                               |     |
|---------------------------------|---------------------------------------------------------------|-----|
| ***** *:***** *.***.*****:***** |                                                               |     |
| k_2                             | SNESYDLISESKDFNKFNSFKGKKLDVFGISYNGQCNTKYIYGGITATNEYLDKPRNIPI  | 120 |
| k_9                             | SNESYDLISESKDFNKFNSFKGKKLDVFGISYNGQCNTKYIYGGITATNEYLDKPRNIPI  | 120 |
| k_7                             | SNESYDLISESKDFNKFNSFKGKKLDVFGISYNGQCNTKYIYGGITATNEYLDKPRNIPI  | 120 |
| k_4                             | SNESYDLISESKDFNKFNSFKGKKLDVFGISYNGQCNTKYIYGGITATNEYLDKSRNIPI  | 120 |
| k_1                             | SNESYDLISESKDFNKFNSFKGKKLDVFGISYNGQCNTKYIYGGITATNEYLDKSRNIPI  | 120 |
| k_3                             | SNESYDLISESKDFNKFNSFKGKKLDVFGISYNGQCNTKYIYGGITATNEYLDKSRNIPI  | 120 |
| k_5                             | SNESYDLISESKDFNKFNSFKGKKLDVFGISYNGQCNTKYIYGGITATNEYLDKSRNIPI  | 120 |
| k_8                             | SNESYDLISESKDFNKFNSFKGKKLDVFGISYNGQCNTKYIYGGITATNEYLDKSRNIPI  | 120 |
| *****:*****.*****:*****         |                                                               |     |
| k_2                             | NIWINGNHKTISTNKVSTNKKFVTAQEIDIKLRRYLQEEYNIYGHNGTKKGEEYGHKSKE  | 180 |
| k_9                             | NIWINGNHKTISTNKVSTNKKFVTAQEIDIKLRRYLQEEYNIYGHNGTKKGEEYGHKSKE  | 180 |
| k_7                             | NIWINGNHKTISTNKVSTNKKFVTAQEIDVKLRLKYLQEEYNIYGHNGTKKGEEYGHKSKE | 180 |
| k_4                             | NIWINGNHKTISTNKVSTNKKFVTAQEIDVKLRLKYLQEEYNIYGHNGTKKGEEYGHKSKE | 180 |
| k_1                             | NIWINGNHKTISTNKVSTNKKFVTAQEIDVKLRLKYLQEEYNIYGHNGTKKGEEYGHKSKE | 180 |
| k_3                             | NIWINGNHKTISTNKVSTNKKFVAAQEIDVKLRLKYLQEEYNIYGHNGTKKGEEYGHKSKE | 180 |
| k_5                             | NIWINGNHKTISTNKVSTNKKLVTAQEIDVKLRLKYLQEEYNIYGHNGTKKGEEYGHKSKE | 180 |
| k_8                             | NIWINGNHKTISTNKVSTNKKLVTAQEIDVKLRLKYLQEEYNIYGHNGTKKGEEYGHKSKE | 180 |
| *****:*:*****:***:*****         |                                                               |     |
| k_2                             | YSGFNIGKVTFHLNNNDTFSYDLFYTGDDGLPKSFLKIYEDNKTVESEKFHLDVDISYKE  | 240 |
| k_9                             | YSGFNIGKVTFHSNNNDTFSYDLFYTGDDGLPKSFLKIYEDNKTVESEKFHLDVDISYKE  | 240 |
| k_7                             | YSGFNIGKVTFHLNNNDTFSYDLFYTGDDGLPKSFLKIYEDNKTVESEKFHLDVDISYKE  | 240 |
| k_4                             | YSGFNIGKVTFHLNNNDTFSYDLFYTGDDGLPKSFLKIYEDNKTVESEKFHLDVDISYKE  | 240 |
| k_1                             | YSGFNIGKVTFHLNNNDTFSYDLFYTGDDGLPKSFLKIYEDNKTVESEKFHLDVDISYKE  | 240 |
| k_3                             | YSGFNIGKVTFHLNNNDTFSYDLFYTGDDGLPKSFLKIYEDNKTVESEKFHLDVDISYKE  | 240 |
| k_5                             | YSGFNIGKVTFHLNNNDTFSYDLFYTGDDGLPKSFLKIYEDNKTVESEKFHLDVDISYKE  | 240 |
| k_8                             | YSGFNIGKVTFHLNNNDTFSYGLFYTGDDGLPKSFLKIYEDNKTVESEKFHLDVDISYKE  | 240 |
| ***** *****.*****               |                                                               |     |
| k_2                             | TK                                                            | 242 |
| k_9                             | TK                                                            | 242 |
| k_7                             | TI                                                            | 242 |
| k_4                             | TI                                                            | 242 |
| k_1                             | TI                                                            | 242 |
| k_3                             | TI                                                            | 242 |
| k_5                             | TI                                                            | 242 |
| k_8                             | TI                                                            | 242 |
| *                               |                                                               |     |

## SEL

|      |                                                           |    |
|------|-----------------------------------------------------------|----|
| l_13 | MKKRLLFVIVITLFISSNHTVLSNGDVGPGLNRFYTKYEYVNLKNIKDKNSPESHRL | 60 |
| l_12 | MKKRLLFVIVITLFISSNHTVLSNGDVGPGLNRFYTKYEYVNLKNIKDKNSPESHRL | 60 |
| l_9  | MKKRLLFVIVITLFISSNHTVLSNGDVGPGLNRFYTKYEYVNLKNIKDKNSPESHRL | 60 |
| l_8  | MKKRLLFVIVITLFISSNHTVLSNGDVGPGLNRFYTKYEYVNLKNIKDKNSPESHRL | 60 |
| l_7  | MKKRLLFVIVITLFISSNHTVLSNGDVGPGLNRFYTKYEYVNLKNIKDKNSPESHRL | 60 |
| l_6  | MKKRLLFVIVITLFISSNHTVLSNGDVGPGLNRFYTKYEYVNLKNIKDKNSPESHRL | 60 |
| l_4  | MKKRLLFVIVITLFISSNHTVLSNGDVGPGLNRFYTKYEYVNLKNIKDKNSPESHRL | 60 |
| l_1  | MKKRLLFVIVITLFISSNHTVLSNGDVGPGLNRFYTKYEYVNLKNIKDKNSPESHRL | 60 |
| l_2  | MKKRLLFVIVITLFISSNHTVLSNGDVGPGLNRFYTKYEYVNLKNIKDKNSPESHRL | 60 |

|      |                                                                                                      |     |
|------|------------------------------------------------------------------------------------------------------|-----|
| 1_5  | MKKRLLFVIVITLFISSNHTVLSNGDVG TGNLRNFYTKY EYVNLKNVKDKNSPESHRL E                                       | 60  |
| 1_10 | -----MNLKNVKDKNSPESHRL E<br>: ****.*****                                                             | 18  |
| 1_13 | YSYKNDTLA EFDNEYITS DLKGKNVDVFGISYKYGNSRTIYGGVTKAENNKLDSPRII                                         | 120 |
| 1_12 | YSYKNDTLA EFDNEYITS DLKGKNVDIFGISYKYGNSRTIYGGVTKAENNKLGSPRII                                         | 120 |
| 1_9  | YSYKNDTLA EFDNEYITS DLKGKNVDVFGISYKYGNSRTIYGGVTKAENNKLDSPRII                                         | 120 |
| 1_8  | YSYKNDTLA EFDNEYITS DLKGKNVDIFGISYKYGNSRTIYGGVTKAENNKLDSPRII                                         | 120 |
| 1_7  | YSYKNDTLA EFDNEYITS DLKGKNVDVFGISYKYGNSRTIYGGVTKAENNKLDSPRII                                         | 120 |
| 1_6  | YSYKNDTLA EFDNEYITS DLKGKNVDVFGISYKYGNSRTIYGGVTKAENNKLDSPRII                                         | 120 |
| 1_4  | YSYKNDTLA EFDNEYITS DLKGKNVDVFGISYKYGNSRTIYGGVTKAENNKLDSPRII                                         | 120 |
| 1_1  | YSYKNDTLA EFDNEYITS DLKGKNVDVFGISYKYGNSRTIYGGVTKAENNKLDSPRII                                         | 120 |
| 1_2  | YSYKNDTLA EFDNEYITS DLKGKNVDVFGISYKYGNSRTIYGGVTKAENNKLDSPRII                                         | 120 |
| 1_5  | YSYKNDTLA EFDNEYITS DLKGKNVDVFGISYKYGNSRTIYGGVTKAENNKLDSPRII                                         | 120 |
| 1_10 | YSYKNDTLA EFDNEYITS DLKGKNVDVFGISYKYGNSRTIYGGVTKAENNKLDSPRII<br>*****.*****.***** *****.*****        | 78  |
| 1_13 | PINLIINGKHQT VTTKSVSTDKKMVT AQEIDVKLRKYLQDEFNIYGHNDTGKGKEYGTSS                                       | 180 |
| 1_12 | PINLIINGKHQT VTTKSVSTDKKMVT AQEIDVKLRKYLQDEFNIYGHNDTGKGKEYGTSS                                       | 180 |
| 1_9  | PINLIINGKHQT VTTKSVSTDKKMVT AQEIDVKLRKYLQDEFNIYGHNDTGKGKEYGTSS                                       | 180 |
| 1_8  | PINLIINGKHQT VTTKSVSTDKKMVT AQEIDVKLRKYLQDEFNIYGHNDTGKGKEYGTSS                                       | 180 |
| 1_7  | PINLIINGKHQT VTTKSVSTDKKMVT AQEIDVKLRKYLQDEFNIYGHNDTGKGKEYGTSS                                       | 180 |
| 1_6  | PINLIINGKHQT VTTKSVSTDKKMVT AQEIDVKLRKYLQDEFNIYGHNDTGKGKEYGTSS                                       | 180 |
| 1_4  | PINLIINGKHQT VTTKCVSTDKKMVT AQEIDVKLRKYLQDEFNIYGHNDTGKGKEYGTSS                                       | 180 |
| 1_1  | PINLIINGKHQT VTTKSVSTDKKMVT AQEIDVKLRKYLQDEFNIYGHNDTGKGKEYGTSS                                       | 180 |
| 1_2  | PINLIINGKHQT VTTKSVSTDKKMVT AQEIDVKLRKYLQDEFNIYGHNDTGKGKEYGTSS                                       | 180 |
| 1_5  | PINLIINGKHQT VTTKSVSTDKKMVT AQEIDVKLRKYLQDEFNIYGHNDTGKGKEYGTSS                                       | 180 |
| 1_10 | PINLIINGKHQT VTTKSVSTDKKMVT AQEIDVKLRKYLQDEFNIYGHNDTGKGKEYGTSS<br>*****.*****.***** *****.*****      | 138 |
| 1_13 | KFYSGFDKGSVVFHMDGNSF SYDLFYTG YGLPESFLKIYKDNKTV DSTQFHL DVEISK R                                     | 240 |
| 1_12 | KFYSGFDKGSVVFHMDGNSF SYDLFYTG YGLPESFLKIYKDNKTV DSTQFHL DVEISK R                                     | 240 |
| 1_9  | KFYSGFDKGSVVFHMDGNSF SYDLFYTG YGLPESFLKIYKDNKTV DSTQFHL DVEISK R                                     | 240 |
| 1_8  | KFYSGFDKGSVVFHMDGNSF SYDLFYTG YGLPESFLKIYKDNKTV DSTQFHL DVEISK R                                     | 240 |
| 1_7  | KFYSGFDKGSVVFHMDGNSF SYDLFYTG YGLPESFLKIYKDNKTV DSTQFHL DVEISK R                                     | 240 |
| 1_6  | KFYSGFDKGSVVFHMDGNSF SYDLFYTG YGLPESFLKIYKDNKTV DSTQFHL DVEISK R                                     | 240 |
| 1_4  | KFYSGFDKGSVVFHMDGNSF SYDLFYTG YGLPESFLKIYKDNKTV DSTQFHL DVEISK R                                     | 240 |
| 1_1  | KFYSGFDKGSVVFHMDGNSF SYDLFYTG YGLPESFLKIYKDNKTV DSTQFHL DVEISK R                                     | 240 |
| 1_2  | KFYSGFDKGSVVFHMDGNSF SYDLFYTG YGLPESFLKIYKDNKTV DSTQFHL DVEISK R                                     | 240 |
| 1_5  | KFYSGFDKGSVVFHMDGNSF SYDLFYTG YGLPESFLKIYKDNKTV GSTQFHL DVEISK R                                     | 240 |
| 1_10 | KFYSGFDKGSVVFHMDGNSF SYDLFYTG YGLPESFLKIYKDNKTV GSTQFHL DVEISK R<br>*****. *.*****.***** *****.***** | 198 |

## SEM

|      |                                                                  |    |
|------|------------------------------------------------------------------|----|
| m_3  | MKRILII VVLLFCYSQNHIATADVGV LNLNRNYYGSYPIEDHQ SINPENNHLSHQLVFSMD | 60 |
| m_8  | MKRILII VVLLFCYSQNHIATADVGV LNLNRNYYGSYPIEDHQ SINPENNHLSHQLVFSMD | 60 |
| m_15 | MKRILII VVLLFCYSQNHIATADVGV LNLNRNYYGSYPIEDHQ SINPENNHLSHQLVFSMD | 60 |
| m_4  | MKRILII VVLLFCYSQNHIATADVGV LNLNRNYYGSYPIEDHQ SINPENNHLSHQLVFSMD | 60 |
| m_6  | MKRILII VVLLFCYSQNHIATADVGV LNLNRNYYGSYPIEDHQ SINPENNHLSHQLVFSMD | 60 |
| m_1  | MKRILII VVLLFCYSQNHIATADVGV LNLNRNYYGSYPIESHQININPDNNLSHQLVFSKD  | 60 |
| m_5  | MKRILII VVLLFCYSQNHIATADVGV LNLNRNYYGSYPIEDHQININPDNNRLSHQLVFSKD | 60 |
| m_2  | MKRILII VVLLFCYSQNHIATADVGV LNLNRNYYGSYPIEDHQININPDNNRLSHQLVFSMD | 60 |
| m_9  | MKRILII VVLLFCYSQNHIATADVGV LNLNRNYYGSYPIEDHQININPDNNRLSHQLVFSMD | 60 |
| m_19 | MKRILII VVLLFCYSQNHIATADVGV LNLNRNYYGSYPIEDHQININPDNNRLSHQLVFSMD | 60 |



|                                                    |                                                              |     |
|----------------------------------------------------|--------------------------------------------------------------|-----|
| *****.**.***:* ***** *                             |                                                              |     |
| m_3                                                | NSSITAEFKNVDDVKKFKNHAVDVYGLSYSGYCLKNKYIYGGVTLAGDYLEKSRCIPINL | 120 |
| m_8                                                | NSTITAEFKNVDDVKKFKNHAVDVYGLSYSGYCLKNKYIYGGVTLAGDYLEKSRCIPINL | 120 |
| m_15                                               | NSTVTAEFKNVDDVKKFKNHAVDVYGLSYSGYCLKNKYIYGGVTLAGDYLEKSRRIPINL | 120 |
| m_4                                                | NSTVTAEFKNVDDVKKFKNHAVDVYGLSYSGYCLKNKYIYGGVTLAGDYLEKSRRIPINL | 120 |
| m_6                                                | NSTVTAEFKNVDDVKKFKNHAVDVYGLSYSGYCLKNKYIYGGVTLAGDYLEKSRRIPINL | 120 |
| m_1                                                | NSTVTAEFKNVEDVKKFKNRAVDVYGLSYSGYCLKNKMYGGVTLAGDYLEKSRCIPINL  | 120 |
| m_5                                                | NSTVTAEFKNVEDVKKFKNRAVDVYGLSYSGYCLKNKMYGGVTLAGDYLEKSRCIPINL  | 120 |
| m_2                                                | NSTVTAEFKNVEDVKKFKNRAVDVYGLSYSGYCLKNKMYGGVTLAGDYLEKSRCIPINL  | 120 |
| m_9                                                | NSTVTAEFKNVDDVKKFKNRAVDVYGLSYSGYCLKNKMYGGVTLAGDYLEKSKYIPINL  | 120 |
| m_19                                               | NSTVTAEFKNVDDVKKFKNRAVDVYGLSYSGYCLKNKMYGGVTLAGDYLEKSKYIPINL  | 120 |
| **.:*****:*****:*****:*****:*****:*****:*****      |                                                              |     |
| m_3                                                | WVNGEHQTISTDKVSTNKKLVTAQEIDTKLRRYLQEEYNIYGFNDTNKGRNYGNKSKFSS | 180 |
| m_8                                                | WVNGEHQTISTDKVSTNKKLVTAQEIDTKLRRYLQEEYNIYGFNDTNKGRNYGNKSKFSS | 180 |
| m_15                                               | WVNGEHQTISTDKVSTNKKLVTAQEIDTKLRRYLQEEYNIYGFNDTNKVRNYGNKSKFSS | 180 |
| m_4                                                | WVNGEHQTISTDKVSTNKKLVTAQEIDTKLRRYLQEEYNIYGFNDTNKGRNYGNKSKFSS | 180 |
| m_6                                                | WVNGEHQTISTDKVSTNKKLVTAQEIDTKLRRYLQEEYNIYGFNDTNKGRNYGNKSKFSS | 180 |
| m_1                                                | WVNGNHKTISTDKVSTNKKIVTAQEIDTKLRRYLQEEYNIYGFNDTNKGRNYGTSKFFS  | 180 |
| m_5                                                | WVNGNLKTISTDKVSTNKKIVTAQEIDTKLRRYLQEEYNIYGFNDTNKGRNYGTSKFFS  | 180 |
| m_2                                                | WVNGEHQTISTEKVSTNKKIVTAQEIDTKLRRYLQEEYNIYGFNDTNKGRNYGTSKFFS  | 180 |
| m_9                                                | WVNSEHQTISTEKVSTNKKIVTAQEIDTKLRRYLQEEYNIYGFNDTNKGRNYGTSKFFS  | 180 |
| m_19                                               | WVNSEHQTISTEKVSTNKKIVTAQEIDTKLRRYLQEEYNIYGFNDTNKGRNYGTSKFFS  | 180 |
| ***.: :****:*****:*****:*****:*****:*****:*****    |                                                              |     |
| m_3                                                | GFNAGKILFHLNDGSSFSYDLFDTGTGQAESFLKIYNDNKTVETEFHLDVEISYKDES   | 239 |
| m_8                                                | GFNAGKILFHLNDGSSFSYDLFDTGTGQAESFLKIYNDNKTVETEFHLDVEISYKDES   | 239 |
| m_15                                               | GFNAGKILFHLNDGSSFSYDLFDTGTGQAESFLKIYNDNKTVETEFHLDVEISYKDES   | 239 |
| m_4                                                | GFNAGKILFHLNDGSSFSYDLFDTGTGQAESFLKIYNDNKTVETEFHLDVEISYKDES   | 239 |
| m_6                                                | GFNAGKILFHLNDSSFSYDLFDTGTGQAESFLKIYNDNKTVETEFHLDVEISYKDES    | 239 |
| m_1                                                | GFNTGKISFHLNDGTSFSYDLFDTGTGQAESFLKIYNDNKTVETDKFHLDEISYKDES   | 239 |
| m_5                                                | GFNTGKISFHLNDGTSFSYDLFDTGTGQAESFLKIYNDNKTVETDKFHLDEISYKDES   | 239 |
| m_2                                                | GFNTGKISFHLNDGSSFSYDLFDTGTGQAESFLKIYNDNKTVETDKFHLDEISYKDES   | 239 |
| m_9                                                | GFNTGKVSFHLNDGSSFSYDLFDTGTGQAESFLKIYNDNKTVETDKFHLDEISYKDES   | 239 |
| m_19                                               | GFNTGKISFHLNDGSSFSYDLFDTGTGQAESFLKIYNDNKTVETDKFHLDEISYKDES   | 239 |
| ***.:*: *****.:*****:*****:*****:*****:*****:***** |                                                              |     |

## SEN

|                                              |                                                              |     |
|----------------------------------------------|--------------------------------------------------------------|-----|
| n_4                                          | MRLFCAIAIIITLLCLINNNYVNADVDKNDLKKKSDIDSSKLFNLTSYYTDITWQLDES  | 60  |
| n_5                                          | -----MKCLINNNYVNAEVDKDKLKKKSDLDSSKLFNLTSYYTDITWQLDES         | 48  |
| n_3                                          | MRLFYIAAIIITLLCLINNNYVNAEVDKDKLKKKSDLDSSKLFNLTSYYTDITWQLDES  | 60  |
| n_7                                          | MRLFYIAAIIITLLCLINNNYVNAEVDKDKLKKKSDLDSSKLFNLTSYYTDITWQLDES  | 60  |
| n_8                                          | MRLFYIAVIIITLLCLINNNYVNAEVDKDKLKKKSDIDSSK----CYTDTITWQLDES   | 55  |
| n_6                                          | MRLFYIAVIIITLLCLINNNYVNAEVDKDKLKKKSDIDSSNLFNLTSYYTDITWQLDES  | 60  |
| n_1                                          | MRLFYIAVIIITLLCLINNNYVNAEVDKDKLKKKSDIDSSNLFNLTSYYTDITWQLDES  | 60  |
| n_2                                          | MRLFYIAVIIITLLCLINNNYVNAEVDKDKLKKKSDIDSSKLFNLTSYYTDITWQLDES  | 60  |
| n_9                                          | -----MLCFLNNNYVNADVNKNLKKKSELDSSKLFNLANYTDTVTWQLEKSN         | 48  |
| n_13                                         | MRLFYIALIIITLLCLINNNYVNADVDKNDLKKKSDLDSSKLFNLTSYYTDITWQLEKSN | 60  |
| : *:***:****:***: *****.:***: *****:****:*** |                                                              |     |
| n_4                                          | KISTDQLLNNTIILKDIDISVLKTSSLKVEFNSSDLANQFKGNIDIYGLYYGNKCVGLT  | 120 |

|      |                                                             |     |
|------|-------------------------------------------------------------|-----|
| n_5  | KISTDQLLNNTIILKNIDISVLKTSSLKVEFNSSDLANQFKGNIDIYGLYFGNKC     | 108 |
| n_3  | KISTDQLLNNTIILKNIDISVLKTSSLKVEFNSSDLANQFKGNIDIYGLYFGNKC     | 120 |
| n_7  | KISTDQLLNNTIILKNIDISVLKTSSLKVEFNSSDLANQFKGNIDIYGLYFGNKC     | 120 |
| n_8  | KISTDQLLNNTIILKNIDISVLKTSSLKVEFNSSDLANQFKGNIDIYGLYFGNKC     | 115 |
| n_6  | KISTDQLLNNTIILKNIDISVLKTSSLKVEFNSSDLANQFKGNIDIYGLYFGNKC     | 120 |
| n_1  | KISTDQLLNNTIILKNIDISVLKTSSLKVEFNSSDLANQFKGNIDIYGLYFGNKC     | 120 |
| n_2  | KISTDQLLNNTIILKNIDISVLKTSSLKVEFNSSDLANQFKGNIDIYGLYFGNKC     | 120 |
| n_9  | VISSDQLLNNTIIFKNIVISVLNTSSLKVEFNSSDLANQYKGRNVDIFGLYGNKC     | 108 |
| n_13 | VISSDQLLNNTIIFKNIVIAELNTSSLKVEFNSSDLANQYKGSNVDIFGLYGNKC     | 120 |
|      | *:*****:*: * *: :***** *****: * *: **: **: *****: **        |     |
| n_4  | EEKTSCLYGGVTIYDGNQLDEERVIGVNVFKDGIQQEGFVIKTKKAKVTVQELDTKVR  | 180 |
| n_5  | EEKTSCLYGGVTIYDGNQLDEERVIGVNVFKDGVQQEGFVIKTKKAKVTVQELDTKVR  | 168 |
| n_3  | EEKTSCLYGGVTIYDGNQLDEERVIGVNVFKDGVQQEGFVIKTKKAKVTVQELDTKVR  | 180 |
| n_7  | EEKTSCLYGGVTIYDGNQLDEERVIGVNVFKDGVQQEGFVIKTKKAKVTVQELDTKVR  | 180 |
| n_8  | EEKTSCLYGGVTIYDGNQLDEERVIGVNVFKDGVQQEGFVIKTKKAKVTVQELDTKVR  | 175 |
| n_6  | EEKTSCLYGGVTIYDGNQLDEERVIGVNVFKDGVQQEGFVIKTKKAKVTVQELDTKVR  | 180 |
| n_1  | EEKTSCLYGGVTIYDGNQLDEERVIGVNVFKDGVQQEGFVIKTKKAKVTVQELDTKVR  | 180 |
| n_2  | EEKTSCLYGGVTIYDGNQLDEERVIGVNVFKDGVQQEGFVIKTKKAKVTVQELDTKVR  | 180 |
| n_9  | GEKTSCLYGGVTIYDGNQLDEERVIGVNVFKDDAQQEGFVIKTKKAKVTVQELDTKVR  | 168 |
| n_13 | GEKTSCLYGGVTIYDGNQLDEERVIGVNVFKDDAQQEGFVIKTKKAKVTVQELDTKVR  | 180 |
|      | ***** *****:*****:*****. *****                              |     |
| n_4  | LENLYKIYNKDTGNIQKGCIFFHSHNHQNSFYFDLYNIKGSVGAEFFQFYSDNRTVSSS | 240 |
| n_5  | LENLYKIYNKDTGNIQKGCIFFHSHNHQDSFYFDLYNVKGSVGAEFFQFYSDNRTVSSS | 228 |
| n_3  | LENLYKIYNKDTGNIQKGCIFFHSHNHQDSFYFDLYNVKGSVGAEFFQFYSDNRTVSSS | 240 |
| n_7  | LENLYKIYNKDTGNIQKGCIFFHSHNHQDSFYFDLYNVKGSVGAEFFQFYSDNRTVSSS | 240 |
| n_8  | LENLYKIYNKDTGNIQKGCIFFHSHNHQDSFYFDLYNIKGSVGAEFFQFYSDNRTVSSS | 235 |
| n_6  | LENLYKIYNKDTGNIQKGCIFFHSHNHQDSFYFDLYNIKGSVGAEFFQFYSDNRTVSSS | 240 |
| n_1  | LENLYKIYNKDTGNIQKGCIFFHSHNHQDSFYFDLYNIKGSVGAEFFQFYSDNRTVSSS | 240 |
| n_2  | LENLYKIYNKDTGNIQKGCIFFHSHNHQDSFYFDLYNIKGSVGAEFFQFYSDNRTVSSS | 240 |
| n_9  | LENLYKIYNKDTGNIQKGCIFFHSHNHQDSFYFDLYNIKGSVGAEFFQFYSDNRTVSSS | 228 |
| n_13 | LENLYKIYNKDTGNIQKGCIFFHSHNHQDSFYFDLYNIKGSVGAEFFQFYSDNRTVSSS | 240 |
|      | *****: *: *: :*****:*****. *****                            |     |
| n_4  | NYHIDVFLYKD                                                 | 251 |
| n_5  | NYHIDVFLYKD                                                 | 239 |
| n_3  | NYHIDVFLYKD                                                 | 251 |
| n_7  | NYHIDVFLYKD                                                 | 251 |
| n_8  | NYHIDVFLYKD                                                 | 246 |
| n_6  | NYHIDVFLYKD                                                 | 251 |
| n_1  | NYHIDVFLYKD                                                 | 251 |
| n_2  | NYHIDVFLYKD                                                 | 251 |
| n_9  | NYHIDVFLYKD                                                 | 239 |
| n_13 | NYHIDVFLYKD                                                 | 251 |
|      | *****                                                       |     |

## SEO

|      |                                                               |    |
|------|---------------------------------------------------------------|----|
| o_9  | MLNVILLIINLIAICNVNNAYANEENPKIEDLCKKSSVDPIALHNIEKDYVNNRFTIDKS  | 60 |
| o_20 | MLNVLLLIINLIAICSVNNAYANEEEKPKIEDLCKKSSVDPIALHNIEKDYVNNRFTIDKS | 60 |
| o_4  | MLNVLLLIINLIAICSVNNAYANEENPKIEDLCKKSSVDDIALHNIDKDYMTNRFTINES  | 60 |
| o_5  | MLNVLLLIITYLIAICSVNNAYANEENPKIEDLCKKSSVDDIALHNIDKDYMTNRFTINES | 60 |
| o_1  | MLNVLLLIITYLIAICSVNNAYANEENPKIEDLCKKSSVDDIALHNIDKDYMTNRFIINES | 60 |
| o_19 | MLNVLLLIITYLIAICSVNNAYANEENPKIEDLCKKSSVDDIALHNIDKDYMTNRFIINES | 60 |
| o_8  | MLNVLLLIILNLIAICSVNNAYANEEDPKIESLCKKSSVDPIALHNINDDYINNRFTTVKS | 60 |
| o_2  | MLNVLLLIITYLIAICSVNNAYANEENPKIEDLCKKSSVDSTALHNINDDYINNRFTTVKS | 60 |
| o_7  | MLNVLLLIITYLIAICSVNNAYANEENPKIEDLCKKSSVDSTALHNINDDYINNRFTTVKS | 60 |
| o_21 | MLNVLLLIILNLIAICSVNNAYANEEDPKIESLCKKSSVDPIALHNINDDYINNRFTTVKS | 60 |
| o_14 | MLNVLLLIILNLIAICSVNNAYANEEDPKIESLCKKSSVDPIDLHNINDDYINNRFTTVKS | 60 |
| o_3  | MLNVLLLIILNLIAICSVNNAYANEEDPKIESLCKKSSVDPIALHNINDDYINNRFTTVKS | 60 |

|      |                                                               |     |
|------|---------------------------------------------------------------|-----|
| o_6  | MLNVLLLILNLIACSVNNAYANEEDPKIESLCKKSSVDPIALHNINDDYINNRFTTVK    | 60  |
|      | ***:***:*****.*****.***.***** ***:..*:*:*:*                   |     |
| o_9  | PVSTTEKFLDFDILLFKNFTWLDGKSAEFKDLKVEFSSSEISKEYFGKTVDIYGVIYKAHC | 120 |
| o_20 | PVSTTEKFLDFDILLFKNFTWLDGKSAEFKDLKVEFSSSEISKEYFGKTVDIYGVIYKAHC | 120 |
| o_4  | TVLTTEKFLDIDILLFKNFTWLDGKSAEFKDLKVEFSSSEISKEYFGKTVDIYGVIYKAHC | 120 |
| o_5  | PVLTTEKFLDFDILLFKNFTWLDGKSAEFKDLKVEFSSSEISKEYFGKTVDIYGVIYKAHC | 120 |
| o_1  | PVLTTEKFLDFDILLFKNFTWLDGKSAEFKDLKVEFSSSEISKEYFGKTVDIYGVIYKAHC | 120 |
| o_19 | PVLTTEKFLDFDILLFKNFTWLDGKSAEFKDLKVEFSSSEISKEYFGKTVDIYGVIYKAHC | 120 |
| o_8  | IVSTTEKFLDFDILLFKNFTWLDGKSAEFKDLKVEFSSSAISKEFLGKTVDIYGVIYKAHC | 120 |
| o_2  | IVSTTEKFLDFDILLFKNFTWLDGKSAEFKDLKVEFSSSEISKEYFGKTVDIYGVIYKAHC | 120 |
| o_7  | IVSTTEKFLDFDILLFKNFTWLDGKSAEFKDLKVEFSSSEISKEYFGKTVDIYGVIYKAHC | 120 |
| o_21 | IVSTTEKFLDFDILLFKNFTWLDGKSAEFKDLKVEFSSSAISKEFLGKTVDIYGVIYKAHC | 120 |
| o_14 | IVSTTEKFLDFDILLFKNFTWLDGKSAEFKDLKVEFSSSAISKEFLGKTVDIYGVIYKAHC | 120 |
| o_3  | IVSTTEKFLDFDILLFKNFTWLDGKSAEFKDLKVEFSSSAISKEFLGKTVDIYGVIYKAHC | 120 |
| o_6  | IVSTTEKFLDFDILLFKNFTWLDGKSAEFKDLKVEFSSSAISKEFLGKTVDIYGVIYKAHC | 120 |
|      | * *:*****:*****.:.***** *:***** *****:*****                   |     |
| o_9  | HGEHQVKTACTYGGITSHENNKLEPKNIGVAVYKDNVNVNTFIVTTDKKKVTAQELDIK   | 180 |
| o_20 | HGEHQVKTACTYGGITSHENNKLEPKNIGVAVYKDNVNVNTFIVTTDKKKVTAQELDIK   | 180 |
| o_4  | HGEHQVKTACTYGGVTPHENNKLEPKNIGVAVYKDNVNVNTFIVTTDKKKVTAQELDIK   | 180 |
| o_5  | HGEHQVKTACTYGGVTPHENNKLEPKNIGVAVYKDNVNVNTFIVTTDKKKVTAQELDIK   | 180 |
| o_1  | HGEHQVKTACTYGGVTPHENNKLEPKNIGVAVYKDNVNVNTFIVTTDKKKVTAQELDIK   | 180 |
| o_19 | HGEHQVKTACTYGGVTPHENNKLEPKNIGVAVYKDNVNVNTFIVTTDKKKVTAQELDIK   | 180 |
| o_8  | HGEHQVDTACTYGGVTPHENNKLEPKNIGVAVYKDNVNVNTFIVTTDKKKVTAQELDIK   | 180 |
| o_2  | HGEHQMNTACTYGGVTPHENNKLEPKNIGVAVYKDNVNVNTFIVTTDKKKVTAQELDIK   | 180 |
| o_7  | YGEHQMNTACTYGGVTPHENNKLEPKNIGVAVYKDNVNVNTFIVTTDKKKVTAQELDIK   | 180 |
| o_21 | HGEHQVDTACTYGGVTPHENNKLEPKNIGVAVYKDNVNVNTFIVTTDKKKVTAQELDIK   | 180 |
| o_14 | HGEHQVDTACTYGGVTPHENNKLEPKNIGVAVYKDNVNVNTFIVTTDKKKVTAQELDIK   | 180 |
| o_3  | HGEHQVDTACTYGGVTPHENNKLEPKNIGVAVYKDNVNVNTFIVTTDKKKVTAQELDIK   | 180 |
| o_6  | HGEHQVDTACTYGGVTPHENNKLEPKNIGVAVYKDNVNVNTFIVTTDKKKVTAQELDIK   | 180 |
|      | :****:..*****:* *****.***:*****                               |     |
| o_9  | VRTKLNNEYKLYDRMTSDVQKGYIKFHSSEHSEKESFYDLYIKGNLPDQYLQIYNDNKT   | 240 |
| o_20 | VRTKLNNEYKLYDRMTSDVQKGYIKFHSSEHSEKESFYDLYIKGNLPDQYLQIYNDNKT   | 240 |
| o_4  | VRTKLNNVYKLYDRMTSDVQKGYIKFHSSEHSEKESFYDLYIKGNLPDQYLQIYNDNKT   | 240 |
| o_5  | VRTKLNNVYKLYDRMTSDVQKGYIKFHSSEHSEKESFYDLYIKGNLPDQYLQIYNDNKT   | 240 |
| o_1  | VRTKLNNVYKLYDRMTSDVQKGYIKFHSSEHSEKESFYDLYIKGNLPDQYLQIYNDNKT   | 240 |
| o_19 | VRTKLNNVYKLYDRMTSDVQKGYIKFHSSEHSEKESFYDLYIKGNLPDQYLQIYNDNKT   | 240 |
| o_8  | VRTKLNNAYKLYDRMTSDVQKGYIKFHSSEHSEKESFYDLYIKGNLPDQYLQIYNDNKT   | 240 |
| o_2  | VRTKLNNAYKLYDRMTSDVQKGYIKFHSSEHSEKESFYDLYIKGNLPDQYLQIYNDNKT   | 240 |
| o_7  | VRTKLNNAYKLYDRMTSDVQKGYIKFHSSEHSEKESFYDLYIKGNLPDQYLQIYNDNKT   | 240 |
| o_21 | VRTKLNNAYKLYDRMTSDVQKGYIKFHSSEHSEKESFYDLYIKGNLPDQYLQIYNDNKT   | 240 |
| o_14 | VRTKLNNAYKLYDRMTSDVQKGYIKFHSSEHSEKESFYDLYIKGNLPDQYLQIYNDNKT   | 240 |
| o_3  | VRTKLNNAYKLYDRMTSDVQKGYIKFHSSEHSEKESFYDLYIKGNLPDQYLQIYNDNKT   | 240 |
| o_6  | VRTKLNNAYKLYDRMTSDVQKGYIKFHSSEHSEKESFYDLYIKGNLPDQYLQIYNDNKT   | 240 |
|      | ***** *****:*****: :*:.: : :*:.*:                             |     |
| o_9  | IDSSDYHIDVYLF- 254                                            |     |
| o_20 | IDSSDYHIDVYLF- 254                                            |     |
| o_4  | IDSSDYHIDVYLF- 254                                            |     |
| o_5  | IDSSDYHIDVYLF- 254                                            |     |
| o_1  | IDSSDYHIDVYLF- 254                                            |     |
| o_19 | IDSSDYHIDVYLF- 254                                            |     |
| o_8  | VSSSNYHIDVFLYKD 255                                           |     |
| o_2  | IDSSDYHIDVYLF- 254                                            |     |
| o_7  | IDSSDYHIDVYLF- 254                                            |     |
| o_21 | IDSSDYHIDVYLF- 254                                            |     |
| o_14 | IDSSDYHIDVYLF- 254                                            |     |

o\_3 IDSSDYHIDVYLFT- 254  
o\_6 IDSSDYHIDVYLFT- 254  
: . \* \* . \* \* \* \* \* : \* : .

## SEP

|     |                                                              |     |
|-----|--------------------------------------------------------------|-----|
| p_4 | MSKIKKTTFILLSFIALTLITSPFVNCSEKSEEINGKDLQKKSELQGTALSNLRQTYYYH | 60  |
| p_2 | MSKIKKTTFILLSFIALTLITSPFVNCSEKSEEINGKDLQKKSELQGTALSNLRQTYYYH | 60  |
| p_3 | MSKIKKITFILLSFIALTLITSPFVNCSEKSEEINGKDLQKKSELQGTALSNLRQTYYYH | 60  |
|     | *****                                                        |     |
| p_4 | GSAIENKESNDQFLKNTILFNDFFTGHQWYNDLLVDLGSKDTANIYKGKKVDLYGVYYG  | 120 |
| p_2 | GSAIENKESNDQFLKNTILFNDFFTGHQWYNDLLVDLGSKDTANIYKGKKVDLYGVYYG  | 120 |
| p_3 | GSAIENKESNDQFLKNTILFNDFFTGHQWYNDLLVDLGSKDTANIYKGKKVDLYGVYYG  | 120 |
|     | *****                                                        |     |
| p_4 | YQCTGGTTFKKTACMYGGVTLHDNNQLEEEKKVPINLWIDGKQNTVPLGTVKTNKKEVTQ | 180 |
| p_2 | YQCTGGTTFKKTACMYGGVTLHDNNQLEEEKKVPINLWIDGKQNTVPLGTVKTNKKEVTQ | 180 |
| p_3 | YQCTGGTTFKKTACMYGGVTLHDNNQLEEEKKVPINLWIDGKQNTVPLGTVKTNKKEVTQ | 180 |
|     | *****                                                        |     |
| p_4 | ELELQSRHYLHETYNLYNTDAFNGKIQRGLIEFHPSSGDSVGYDLFGAQGGYPDTQLRIY | 240 |
| p_2 | ELDLQSRHYLHETYNLYNTDAFNGKIQRGLIEFHPSSGDSVGYDLFGAQGGYPDTQLRIY | 240 |
| p_3 | ELDLQSRHYLHETYNLYNTDAFNGKIQRGLIEFHPSSGDSVGYDLFGAQGGYPDTQLRIY | 240 |
|     | ** : *****                                                   |     |
| p_4 | RDNKTIKSKNMHIDIYLYTT                                         | 260 |
| p_2 | RDNKTIKSKNMHIDIYLYTT                                         | 260 |
| p_3 | RDNKTIKSKNMHIDIYLYTT                                         | 260 |
|     | *****                                                        |     |

## SEQ

|     |                                                              |     |
|-----|--------------------------------------------------------------|-----|
| q_3 | MNKIFRILTVSLFFFTFLIKNNLAYADVGVINLRNFYANYEPEKLQGVSSGNFSTSHQLE | 60  |
| q_5 | MNKIFRVLTVSLFFFTFLIKNNLAYADVGVINLRNFYANYEPEKLQGVSSGNFSTSHQLE | 60  |
| q_2 | MNKIFRVLTVSLFFFTFLIKNNLAYADVGVINLRNFYANYEPEKLQGVSSGNFSTSHQLE | 60  |
| q_1 | MNKIFRILTVSLFFFTFLIKNNLAYADVGVINLRNFYANYEPEKLQGVSSGNFSTSHQLE | 60  |
| q_4 | MNKIFRILTVSLFFFTFLIKNNLAYADVGVINLRNFYANYEPEKLQGVSSGNFSTSHQLE | 60  |
|     | ***** : ***** : * * : * * . *****                            |     |
| q_3 | YIDGKYTLYSQFHNEYAKRLKDHKVDIFGISYSGLCNTKMYGGITLANQNLDKPRNIP   | 120 |
| q_5 | YIDGKYTLYSQFHNEYAKRLKDHKVDIFGISYSGLCNTKMYGGITLANQNLDKPRNIP   | 120 |
| q_2 | YIDGKYTLYSQFHNEYAKRLKDHKVDIFGISYSGLCNTKMYGGITLANQNLDKPRNIP   | 120 |
| q_1 | YIDGKYTLYSQFHNEYAKRLKDHKVDIFGISYSGLCNTKMYGGITLANQNLDKPRNIP   | 120 |
| q_4 | YIDGKYTLYSQFHNEYAKRLKDHKVDIFGISYSGLCNTKMYGGITLANQNLDKPRNIP   | 120 |
|     | *****                                                        |     |



|     |                                                                              |     |
|-----|------------------------------------------------------------------------------|-----|
| r_4 | DYKVRNWLTTNNKKLYEFDGSAYETGYIKFIEENKDSFWYDLFPKKDLVPFIPYKFVNIYG<br>*****.***** | 240 |
| r_2 | DNKTIDASSVKIEVHLTTM                                                          | 259 |
| r_5 | DNKTIDASSVKIEVHLTTT                                                          | 259 |
| r_1 | DNKTIDASSVKIEVHLTTT                                                          | 259 |
| r_4 | DNKTIDASSVKIEVHLTTT<br>*****                                                 | 259 |

## SES

|     |                                                                             |     |
|-----|-----------------------------------------------------------------------------|-----|
| s_3 | MNYSKITVSLIIILLCTFSFEFSFNRFVQADESRPKIESLKKKSELDSTALYNIKTSYSQ                | 60  |
| s_1 | MNYSKITVTLIIILLCTFSFEFSFNRFVQADESRPKIESLKKKSELDSTALYNIKTSYSQ<br>*****.***** | 60  |
| s_3 | DNIILDIKNKTNSTQLLSNDLIFDDITLKEWNKNSLKTENFSSEIANHFKGKKVDIFGIY                | 120 |
| s_1 | DNIILDIKNKTNSTQLLSNDLIFDDITLKEWNKNSLKTENFSSEIANHFKGKKVDIFGIY<br>*****       | 120 |
| s_3 | YGANCIGEVSKRTGCIYGGITLHEEEKIDQKNSIGVNVFKDGSQQKGFMITTDKKEPTIQ                | 180 |
| s_1 | YGANCIGEVSKRTGCIYGGITLHEEEKIDQKNSIGVNVFKDGSQQKGFMITTDKKEPTIQ<br>*****       | 180 |
| s_3 | ELDLKTRKVIQNYKIYNSETGNIQKGYMEFHSNSSFYYDLFNFKGKYSVDLKFYNDN                   | 240 |
| s_1 | ELDLKTRKVIQNYKIYNSETGNIQKGYMEFHSNSSFYYDLFNFKGKYSVDLKFYNDN<br>*****          | 240 |
| s_3 | KTINSSNLHIDVYLYSQ                                                           | 257 |
| s_1 | KTINSSNLHIDVYLYSQ<br>*****                                                  | 257 |

## SET

>t\_1  
MKKCILFIFSIILLVSISTLFIPNAKSDSREGLKDFYSKKIDVYTNKKINEKDKYSVDIEVDNYVYRINTLDDKILNQFKV  
GDYVDAWGHIIINNPKIGKVIKFDGDISKHSPDKPTNISYRINLFKEQKQTEVTPEKELEIGNRYLTMKQIDYRIKSYLV  
KKQQLYTEFYNGKIEISMLDGGKHFIDLSTYYYDPSNFTLDYTKISHFDIYMEK

## SEU

|      |                                                                                             |     |
|------|---------------------------------------------------------------------------------------------|-----|
| u_11 | MKLFAFLFICVKSCSLLFMLNDNPKPEQLNKASEFTGLMDNMRYLYDDKHVSETNIKAQE                                | 60  |
| u_18 | MKLFAFLFICVKSCSLLFMLNDNPKPEQLNKASEFTGLMDNMRYLYDDKHVSETNIKAQE                                | 60  |
| u_6  | MKLFAFIFICVKSCSLLFMLNGNPKPEQLNKASEFTGLMDNMRYLYDDKHVSETNIKSQE                                | 60  |
| u_4  | MKLFAFIFICVKSCSLLFMLNGNPKPEQLNKASEFTGLMDNMRYLYDDKHVSETNIKSQE                                | 60  |
| u_5  | MKLFAFIFICVKSCSLLFMLNGNPKPEQLNKASEFTGLMDNMRYLYDDKHVSETNIKSQE                                | 60  |
| u_1  | MKLFAFIFICVKSCSLLFMLNGNPKPEQLNKASEFTGLMDNMRYLYDDKHVSEINIKAE                                 | 60  |
| u_7  | MKLFAFIFICVKSCSLLFMLNGNPRPEQLNKASEFTGLMDNMRYLYDDKHVSETNIKVQE                                | 60  |
| u_17 | MKLFAFIFICVKSCSLLFMLNGNPRPEQLNKASEFTGLMDNMRYLYDDKHVSETNIKAQE                                | 60  |
| u_9  | MKLFAFIFICVKSCSLLFMLNGNPRPEQLNKASEFTGLMDNMRYLYDDKHVSETNIKAQE                                | 60  |
| u_2  | MKLFAFIFICVKSCSLLFMLNGNPRPEQLNKASEFTGLMDNMRYLYDDKHVSETNIKAQE                                | 60  |
| u_10 | MKLFAFIFICVKSCSLLFMLNGNPRPEQLNKASEFTGLMDNMRYLYDDKHVSETNIKAQE<br>*****.*****.***.*****.***** | 60  |
| u_11 | KFLQHDLLFKINR-----SKILKTEFNKNSLSDKYKNKNVDLFGTNYYNQCYFSSDNMEL                                | 115 |
| u_18 | KFLQHDLLFKING-----SKILKTEFNKNSLSDKYKNKNVDLFGTNYYNQCYFSADNMEL                                | 115 |
| u_6  | KFLQHDLLFEING-----SKILKTEFNKNSLSDKYKNKNVDLFGTNYYNQCYFSSDNMEL                                | 115 |
| u_4  | KFLQHDLLFKING-----SKILKTEFNKNSLSDKYKNKNVDLFGTNYYNQCYFSLDNMEL                                | 115 |
| u_5  | KFLQHDLLFKING-----SKILKTEFNKNSLSDKYKNKNVDLFGTNYYNQCYFSSDNMEL                                | 115 |
| u_1  | KFLQHDLLFKINGSKIDGSKILKTEFNKNSLSDKYKNKNVDLFGTNYYNQCYFSADNMEL                                | 120 |
| u_7  | KFLQHDLLFKINGSKIDGSKILKTEFNKNSLSDKYKNKNVDLFGTNYYNQCYFSADNMEL                                | 120 |
| u_17 | KFLQHDLLFKINGSKIDGSKILKTEFNKNSLSDKYKNKNVDLFGTNYYNQCYFSADNMEL                                | 120 |
| u_9  | KFLQHDLLFKINGSKIDGSKILKTEFNKNSLSDKYKNKNVDLFGTNYYNQCYFSADNMEL                                | 120 |
| u_2  | KFLQHDLLFKINGSKIDGSKILKTEFNKNSLSDKYKNKNVDLFGTNYYNQCNFSADNMEL                                | 120 |

|      |                                                                                                           |     |
|------|-----------------------------------------------------------------------------------------------------------|-----|
| u_10 | KFLQHDLDFKINGSKIDGSKILKTEFNKSLSDKYKNKNVDLFGTNYYNQCYFSADNMEL<br>*****:*** *****:*****:***** ** ** *****    | 120 |
| u_11 | NDGILIEKTCMYGGVTEHDGNQIDKNNSTDNSHNILIKVYENERNSLSFDIPTNKKNITA                                              | 175 |
| u_18 | NDGILIGKTCMYGGVTEHDGNQIDKNNSTDNSHNILIKVYENERNSLSFDIPTNKKNITA                                              | 175 |
| u_6  | NDGRLEKTCMYGGVTEHDGNQIDKNNSTDNSHNILIKVYENERNSLSFDIPTNKKNITA                                               | 175 |
| u_4  | NDGRLEKTCMYGGVTEHDGNQIDKNNSTDNSHNILIKVYENERNSLSFDIPTNKKNITA                                               | 175 |
| u_5  | NDGRLEKTCMYGGVTEHDGNQIDKNNSTDNSHNILIKVYENERNSLSFDIPTNKKNITA                                               | 175 |
| u_1  | NDGRLEKTCMYGGVTEHDGNQIDKNNSTDNSHNILIKVFENERNSLSFDIPTNKKNITA                                               | 180 |
| u_7  | NDGRLEKTCMYGGVTEHDGNQIDKNNLTDNSHNILIKVYENERNTLSFDISTNMKNITA                                               | 180 |
| u_17 | NDGRLEKTCMYGGVTEHDGNQIDKNNLTDNSHNILIKVYENERNTLSFDISTNMKNITA                                               | 180 |
| u_9  | NDGRLEKTCMYGGVTEHDGNQIDKNNLTDNSHNILIKVYENERNTLSFDISTNKKNITA                                               | 180 |
| u_2  | NDGRLEKTCMYGGVTEHDGNQIDKNNLTDNSHNILIKVYENERNTLSFDISTNKKNITA                                               | 180 |
| u_10 | NDGRLEKTCMYGGVTEHDGNQIDKNNLTDNSHNILIKVYENERNTLSFDISTNKKNITA<br>*** ** *****:*****:***** ** *****          | 180 |
| u_11 | QEIDYKVRNYLLKHKDLYEFNSSPYETGYIKFIEGNGNTFWYDMPESGEKFPYPTKYLLI                                              | 235 |
| u_18 | QEIDYKVRNYLLKHKDLYEFNSSPYETGYIKFIEGNGNTFWYDMPESGEKFPYPTKYLLI                                              | 235 |
| u_6  | QEIDYKVRNYLLKHKDLYEFNSSPYETGYIKFIEGSGHSFWYDMPESGKKFPYPTKYLLI                                              | 235 |
| u_4  | QEIDYKVRNYLLKHKDLYEFNSSPYETGYIKFIEGSGHSFWYDMPESGKKFPYPTKYLLI                                              | 235 |
| u_5  | QEIDYKVRNYLLKHKDLYEFNSSPYETGYIKFIEGSGHSFWYDMPESGKKFPYPTKYLLI                                              | 235 |
| u_1  | QEIDYKVRNYLLKHKDLYEFNSSPYETGYIKFIEGNGHSFWYDMPESGEKFPYPTKYLLI                                              | 240 |
| u_7  | QEIDYKVRNYLLKHKDLYEFNSSPYESGYIKFIEGNGHSFWYDMPESGEKFPYPTKYLLI                                              | 240 |
| u_17 | QEIDYKVRNYLLKHKDLYEFNSSPYESGYIKFIEGNGHSFWYDMPESGEKFPYPTKYLLI                                              | 240 |
| u_9  | QEIDYKVRNYLLKHKDLYEFNSSPYETGYIKFIEGNGHSFWYDMPESGEKFPYPTKYLLI                                              | 240 |
| u_2  | QEIDYKVRNYLLKHKDLYEFNSSPYETGYIKFIEGNGHSFWYDMPESGEKFPYPTKYLLI                                              | 240 |
| u_10 | QEIDYKVRNYLLKHKDLYEFNSSPYETGYIKFIEGNGHSFWYDMPESGEKFPYPTKYLLI<br>*****:***:*****:***** ..:****:*****:***** | 240 |
| u_11 | YNDNKTVDQSQSVNVEVHLTKK                                                                                    | 256 |
| u_18 | YNDNKTVDQSQSVNVEVHLTKK                                                                                    | 256 |
| u_6  | YNDNKTVESKSIINVEVHLTKK                                                                                    | 256 |
| u_4  | YNDNKTVESKSIINVEVHLTKK                                                                                    | 256 |
| u_5  | YNDNKTVESKSIINVEVHLTKK                                                                                    | 256 |
| u_1  | YNDNKTVESKSIINVEVHLTKK                                                                                    | 261 |
| u_7  | YNDNKTVESKSIINVEVHLTKK                                                                                    | 261 |
| u_17 | YNDNKTVESKSIINVEVHLTKK                                                                                    | 261 |
| u_9  | YNDNKTVESKSIINVEVHLTKK                                                                                    | 261 |
| u_2  | YNDNKTVESKSIINVEVHLTKK                                                                                    | 261 |
| u_10 | YNDNKTVESKSIINVEVHLTKK<br>*****:***:*****                                                                 | 261 |

## SEX

|      |                                                              |    |
|------|--------------------------------------------------------------|----|
| x_27 | MFKKHHSKNSIVLKSILSLGIIYSGIFGINSKADASIQDSSSVHDKQLLKVKEVPNNSEK | 60 |
| x_28 | MFKKHHSKNSIVLKSILSLGIIYSGIFGINSKADASIQDSSSVHDKQLLKVKEVPNNSEK | 60 |
| x_47 | MFKKHHSKNSIVLKSILSLGIIYSGIFGINSKADASIQDSSSVHDKQFQKVEEVPNNSEK | 60 |
| x_10 | MFKKHHSKNSIVLKSILSLGIIYSGIFGINSKADASTQNSSSVHDKQLQKVEEVPNNSEK | 60 |
| x_34 | MFKKHHSKNSIVLKSILSLGIIYSGIFGINSKADASTQNSSSVHDKQLQKVEEVPNNSEK | 60 |
| x_3  | MFKKHHSKNSIVLKSILSLGIIYSGIFGINSKADASTQNSSSVHDKQLQKVEEVPNNSEK | 60 |
| x_16 | MFKKHHSKNSIVLKSILSLGIIYSGIFGINSKADASTQNSSSVHDKQLQKVEEVPNNSEK | 60 |
| x_14 | MFKKHHSKNSIVLKSILSLGIIYSGIFGINSKADASTQNSSSVHDKQLQKVEEVPNNSEK | 60 |
| x_12 | MFKKHHSKNSIVLKSILSLGIIYSGIFGINSKADASTQNSSSVHDKQLQKVEEVPNNSEK | 60 |
| x_22 | MFKKHHSKNSIVLKSILSLGIIYSGIFGINSKADASTQNSSSVHDKQLQKVEEVPNNSEK | 60 |
| x_41 | MFKKHHSKNSIVLKSILSLGIIYSGIFGINSKADASTQNSSSVHDKQLQKVEEVPNNSEK | 60 |
| x_6  | MFKKHHSKNSIVLKSILSLGIIYSGIFGINSKADASTQNSSSVHDKQLQKVEEVPNNSEK | 60 |
| x_36 | MFKKHHSKNSIVLKSILSLGIIYSGIFGINSKADASTQNSSSVHDKQLQKVEEVPNNSEK | 60 |
| x_4  | MFKKHHSKNSIVLKSILSLGIIYSGIFGINSKADASTQNSSSVHDKQLQKVEEVPNNSEK | 60 |
| x_7  | MFKKHHSKNSIVLKSILSLGIIYSGIFGINSKADASTQNSSSVHDKQLQKVEEVPNNSEK | 60 |
| x_17 | MFKKHHSKNSIVLKSILSLGIIYSGIFGINSKADASTQNSSSVHDKQLQKVEEVPNNSEK | 60 |
| x_15 | MFKKHHSKNSIVLKSILSLGIIYSGIFGINSKADASTQNSSSVHDKQLQKVEEVPNNSEK | 60 |
| x_45 | MFKKHHSKNSIVLKSILSLGIIYSGIFGINSKADASTQNSSSVHDKQLQKVEEVPNNSEK | 60 |
| x_5  | MFKKHHSKNSIVLKSILSLGIIYSGIFGINSKADASTQNSSSVHDKQLQKVEEVPNNSEK | 60 |

|      |                                                               |     |
|------|---------------------------------------------------------------|-----|
| x_9  | MFKKYDSKNSIVLKSILSLGIIYGGTFGIYPKADASTQNSSSVQDKQLQKVVEVPNNSEK  | 60  |
| x_25 | MFKKYDSKNSIVLKSILSLGIIYSGSFGIYPKADASTQNSSSVQDKQLQKVVEVPNNSEK  | 60  |
| x_1  | MFKKYDSKNSILLKSILSLGIIYGGTFGIYPKADASTQNSSSVQDKQLQKVVEVPNNSEK  | 60  |
| x_24 | MFKKYDSKNSIVLKSILSLGIIYGGTFGIYPKADASTQNSSSVQDKQLQKVVEVPNNSEK  | 60  |
|      | *****:***** **.* *** **:*** *: * **:***: **:*****             |     |
| x_27 | ALVKKLYDRYSQNTINGKSNKSRNWVYSERPLNENQVRIHLEGTYTVAGRVYTPKRNITL  | 120 |
| x_28 | ALVKKLYDRYSKDTINGKSNKSRNWVYSERPLNENQVRIHLEGTYTVAGRVYTPKRNITL  | 120 |
| x_47 | ALVKKLYDRYSQNTINGKSNKSRNWVYSERPLNENQVRIHLEGTYTVAGRVYTPKRNITL  | 120 |
| x_10 | ALVKKLYDRYSKNTINGKSNKSRNWVYSERPLNGNQVRINLEGTYRVADRVYTPKRNITL  | 120 |
| x_34 | ALVKKLYDRYSKNTINGKSNKSRNWVYSERPLNGNQVRINLEGTYTVAGRVYTPKRNITL  | 120 |
| x_3  | ALVKKLYDRYSQNTINGKSNKSRNWVYSERPLNENQVRINLEGTYRVADRVYTPKRNITL  | 120 |
| x_16 | ALVKKLYDRYSQNTINGKSNKSRNWVYSERPLNENQVRINLEGTYRVADRVYTPKRNITL  | 120 |
| x_14 | ALVKKLYDRYSQNTINGKSNKARNWVYSERPLNENQVRIHLEGTYRVADRVYTPKRNITL  | 120 |
| x_12 | ALVKKLYDRYSQNTINGKSNKARNWVYSERPLNENQVRIHLEGTYRVADRVYTPKRNITL  | 120 |
| x_22 | ALVKKLYDRYSQNTINGKSNKARNWVYSERPLNENQVRIHLEGTYRVADRVYTPKRNITL  | 120 |
| x_41 | ALVKKLYDRYSQNTINGKSNKSRNWVYSERPLNGNQVRINLEGTYRVADRVYTPKRNITL  | 120 |
| x_6  | ALVKKLYDRYSKDTINGKSNKSRNWVYSERPLNENQVRIHLEGTYRVADRVYTPKRNITL  | 120 |
| x_36 | ALVKKLYDRYSKDTINGKSNKSRNWVYSERPLNENQVRIHLEGTYRVADRVYTPKRNITL  | 120 |
| x_4  | ALVKKLYDRYSQNTINGKSNKSRNWVYSERPLNENQVRIHLEGTYTVAGRVYTPKRNITL  | 120 |
| x_7  | ALVKKLYDRYSQNTINGKSNKSRNWVYSERPLNENQVRIHLEGTYTVADRVYTPKRNITL  | 120 |
| x_17 | ALVKKLYDRYSQNTINGKSNKSRNWVYSERPLNENQVRIHLEGTYTVADRVYTPKRNITL  | 120 |
| x_15 | ALVKKLYDRYSKNTINGKSNKSRNWVYSERPLNGNQVRINLEGTYTVAGRVYTPKRNITL  | 120 |
| x_45 | ALVKKLYDRYSKDTINGKSNKSRNWVYSERPLNENQVRIHLEGTYTVAGRVYTPKRNITL  | 120 |
| x_5  | ALVKKLYDRYSKDTINGKSNKSRNWVYSERPLNENQVRIHLEGTYTVAGRVYTPKRNITL  | 120 |
| x_9  | ALVKKLYDRYSKDTINGKSNKSRNWVYSERPLNENQVRIHLEGTYTVADRVYTPKRNITL  | 120 |
| x_25 | ALVKKLYDRYSKDTINGKSNKSRNWVYSERPLNENQVRIHLEGTYTVAGRVYTPKRNITL  | 120 |
| x_1  | ALVKKLYDRYSKDTINGKSNKSRNWVYSERPLNENQVRIHLEGTYTVAGRVYTPKRNITL  | 120 |
| x_24 | ALVKKLYDRYSKDTINGKSNKSRNWVYSERPLNENQVRIHLEGTYTVAGRVYTPKRNITL  | 120 |
|      | *****:*****:***** *****:***** **.* *****                      |     |
| x_27 | NKEVVTLKELDHIIIRFAHISYGLYMGEHLPKGNIVINTKNGGKYTLESHKELQKDRENVK | 180 |
| x_28 | NKEVVTLKELDHIVRFAHISYGLYMGEHLPKGNIVINTKDGGKYTLESHKELQKDRENVE  | 180 |
| x_47 | NKEVVTLKELDHIVRFAHISYGLYMGEHLPKGNIVINTKDGGKYTLESHKELQKDRENVE  | 180 |
| x_10 | NKEVVTLKELDHIIIRFAHISYGLYMGEHLPKGNIVINTKDGGKYTLESHKELQKDRENVK | 180 |
| x_34 | NKEVVTLKELDHIIIRFAHISYGLYMGEHLPKGNIVINTKNGGKYTLESHKELQKDRENVK | 180 |
| x_3  | NKEVVTLKELDHIIIRFAHISYGLYMGEHLPKGNIVINTKDGGKYTLESHKELQKDRENVK | 180 |
| x_16 | NKEVVTLKELDHIIIRFAHISYGLYMGEHLPKGNIVINTKDGGKYTLESHKELQKDRENVK | 180 |
| x_14 | NKEVVTLKELDHIIIRFAHISYGLYMGEHLPKGNIVINTKNGGKYTLESHKELQKNRGNVE | 180 |
| x_12 | NKEVVTLKELDHIIIRFAHISYGLYMGEHLPKGNIVINTKNGGKYTLESHKELQKNRENVE | 180 |
| x_22 | NKEVVTLKELDHIIIRFAHISYGLYMGEHLPKGNIVINTKNGGKYTLESHKELQKNRENVE | 180 |
| x_41 | NKEIVTLKELDHIIIRFAHISYGLYMGEHLPKGNIVINTKNGGKYTLESHKELQKDRENVK | 180 |
| x_6  | NKEVVTLKELDHIIIRFAHISYGLYMGEHLPKGNIVINTKNGGKYTLESHKELQKDRENVK | 180 |
| x_36 | NKEVVTLKELDHIIIRFAHISYGLYMGEHLPKGNIVINTKNGGKYTLESHKELQKDRENVK | 180 |
| x_4  | NKEVVTLKELDHIIIRFAHISYGLYMGEHLPKGNIVINTKNGGKYTLESHKELQKDRENVK | 180 |
| x_7  | NKEVVTLKELDHIIIRFAHISYGLYMGEHLPKGNIVINTKNGGKYTLESHKELQKDRENVK | 180 |
| x_17 | NKEVITLKELDHIIIRFAHISYGLYMGEHLPKGNIVINTKNGGKYTLESHKELQKDRENVK | 180 |
| x_15 | NKEVVTLKELDHIIIRFAHISYGLYMGEHLPKGNIVINTKNGGKYTLESHKELQKNRENVE | 180 |
| x_45 | NKEVVTLKELDHIIIRFAHISYGLYMGEHLPKGNIVINTKDGGKYTLESHKELQKDRENVK | 180 |



|      |                                                              |     |
|------|--------------------------------------------------------------|-----|
| x_5  | NKEVVTLKELDHIIRFAHISYGLYMGEHLPKGNIVINTKDGGKYTLESHKELQKDRENVK | 180 |
| x_9  | NKEVVTLKELDHIIRFAHISYGLYMGEHLPKGNIVINTKDGGKYTLESHKELQKDRENVK | 180 |
| x_25 | NKEVVTLKELDHIIRFAHISYGLYMGEHLPKGNIVINTKNGGKYTLESHKELQKNRENVE | 180 |
| x_1  | NKEVVTLKELDHIIRFAHISYGLYMGEHLPKGNIVINTKNGGKYTLESHKELQKNRENVE | 180 |
| x_24 | NKEVVTLKELDHIIRFAHISYGLYMGEHLPKGNIVINTKNGGKYTLESHKELQKNRENVE | 180 |

\*\*\*.:\*\*\*\*\*.\*\*\*\*\*.\*\*\*\*\*.\*\*\*\*\*.\* \*\*.

|      |                          |     |
|------|--------------------------|-----|
| x_27 | INTDDIKNVTTFELVKSVDIEQA  | 203 |
| x_28 | INTADIKNVTTFELVKSVDIEQA  | 203 |
| x_47 | INTADIKNVTTFELVKSVDIEQA  | 203 |
| x_10 | INTADIKNVTTFKLVSVDIEQV   | 203 |
| x_34 | INTDDIKNVTTFELVKSVDIEQV  | 203 |
| x_3  | INTADIKNVTTFKLVSVDIEQV   | 203 |
| x_16 | INTDDIKNVTTFKLVSVDIEQV   | 203 |
| x_14 | INTDDIKNVTTFELVKSVDIEQV  | 203 |
| x_12 | INTDDIKNVTTFELVKSVDIEQV  | 203 |
| x_22 | INTDDIKNVTTFELVKSVDIGQV  | 203 |
| x_41 | INTDDIKNVTTFELVKSVDIEQV  | 203 |
| x_6  | INTDDIKNVTTFELVKSVDIEQV  | 203 |
| x_36 | INTDDIKNVTTFELVKSVDIEQV  | 203 |
| x_4  | IKTDDIKNVTTFELVKRVNDIEQV | 203 |
| x_7  | NNTDDIKNVTTFELVKSVDIEQV  | 203 |
| x_17 | INTDDIKNVTTFELVKSVDIEQV  | 203 |
| x_15 | INTADVENVTFDLVKSVDIEQV   | 203 |
| x_45 | INTADIKNVTTFKLVSVDIEQV   | 203 |
| x_5  | INTADIKNVTTFKLVSVDIEQV   | 203 |
| x_9  | INTADIKNVTTFKLVSVDIEQV   | 20  |
| x_25 | INTDDIKNVTTFELVKSVDIEQV  | 203 |
| x_1  | INTDDIKNVTTFELVKSVDIEQV  | 203 |
| x_24 | INTDDIKNVTTFELVKSVDIEQV  | 203 |

:\* \*:\*\*\*\*\*.\*\*\* \*\*\*\* \*.

## SEY

|      |                                                                 |    |
|------|-----------------------------------------------------------------|----|
| y_5  | MKAKLWFLLLTTLAFLIAVMGSIGIAEVGAKTGTGLITENSNDLSLKEHYAQKFEVYTNKEVT | 60 |
| y_11 | MKAKLWFLLLTTLAFLIAVMGSIGIAEVEAKTTGLITENSNDLSLKEHYAQKFEVYTNKEVT  | 60 |
| y_2  | MKAKLCFLLLTTLAFLIAVTGSIGIAEVKAKTGTGLITENSNDLSLKEHYAQKFEVYTNKEVT | 60 |
| y_1  | MKAKLWFLLLTTLAFLIAVTGSIGIAEVKAKTGTGLITENSNDLSLKEHYAQKFEVYTNKEIT | 60 |
| y_7  | MKAKLWFLLLTTLAFLIAVTGSIGIAEVKAKTGTGLITENSNDLSLKEHYAQKFEVYTNKEVT | 60 |
| y_6  | MKAKLWFLLLTTLAFLIAVTGSIGIAEVKAKTGTGLITENSNDLSLKEHYAQKFEVYTNKEVT | 60 |
| y_3  | MKAKLWFLLLTTLAFLIAVTGSIGIAEVKAKTGTGLITENSNDLSLKEHYAQKFEVYTNKEVT | 60 |
| y_4  | MKAKLWFLLLTTLAFLIAVTESIGIAEVKAKTGTGLITENSNDLSLKEHYAQKFEVYTNKEVT | 60 |

\*\*\*\*\* \*\*\*\*\* \*\*\*\*\* \*\*\*\*\*.

|      |                                                              |     |
|------|--------------------------------------------------------------|-----|
| y_5  | GVGENYIDAKVDTYNVRTVLYNTDYLKQFKNQDKVNIWGTLYENQQSKVYRGTVVKYDPI | 120 |
| y_11 | GVGENYIDAKVDTYNVRTVLYNTDYLKQFKNQDKVNIWGTLYENQQSKVYRGTVVKYDPI | 120 |
| y_2  | GVGENYIDAKVDTYNVRTVLYNTDYLKQFKNQDKVNIWGTLYENQQSKVYRGTVVKYDPI | 120 |
| y_1  | GVGENYIDAKVDTYNVRTVLYNTDYLKQFKNQDKVNIWGTLYENQQSKVYRGTVVKYDPI | 120 |
| y_7  | GVGENYIDAKVDTYNVRTVLYNTDYLKQFKNQDKVNIWGTLYENQQSKVYRGTVVKYDPI | 120 |
| y_6  | GVGENYIDVQVDTYNVRTVLYNTDYLKQFKNQDKVNIWGTLYENQQSKVYRGTVVKYDPI | 120 |
| y_3  | GVGENYIDTKVDTYNVRTVLYNTDYLKQFKNQDKVNIWGTLYENQQSKVYRGTVVKYDPI | 120 |

|      |                                                                                         |     |
|------|-----------------------------------------------------------------------------------------|-----|
| y_4  | GVGENYIDTKVDTYNVRTVLYNTDYLKQFKNQDKVNIWGTLYENQQSKVYRGTVVKYDPI<br>*****.*****:*****:***** | 120 |
| y_5  | SKVTNLSYRMNLFVNGHQTKVNPDSLLEVKNKQISLKETDFRIRKYLLEKEHLYSNYNSG                            | 180 |
| y_11 | SKVTNLSYRMNLFVNGHQTKVNPDSLLEVKNKQISLKETDFRIRKYLLEKEHLYSNYNSG                            | 180 |
| y_2  | SKVTNLSYRMNLFVNGHQTKVNPDSLLEVKNKQISLKETDFRIRKYLLEKEHLYSNYNSG                            | 180 |
| y_1  | SKVTNLSYRMNLFVNGHQTKVNPDSLLEVKNKQISLKETDFRIRKYLLEKEHLYSNYNSG                            | 180 |
| y_7  | SKVTNLSYRMNLFVNGHQTKVNPDSLLEVKNKQISLKETDFRIRKYLLEKEHLYSNYNSG                            | 180 |
| y_6  | SKVTNLSYRMNLFVNGHQTKVNPDSLLEVKNKQISLKETDFRIRKYLLEKEHLYSNYNSG                            | 180 |
| y_3  | SKVTNLSYRMNLFVNGHQTKVNPDSLLEVKNKQISLKETDFRIRKYLLEKEHLYSNYNSG                            | 180 |
| y_4  | SKVTNLSYRMNLFVNGHQTKVNPDSLLEVKNKQISLKETDFRIRKYLLEKEHLYSNYNSG<br>*****                   | 180 |
| y_5  | ELIEMKNGTRHKIDLGILSDSQEKTFFDNISHIDIYMK                                                  | 221 |
| y_11 | ELIEMKNGTRHKIDLGILSDSQEKTFFDNISHIDIYMK                                                  | 221 |
| y_2  | ELIVEMKNGARHKIDLGILSDSQEKTFFDNISHIDIYMK                                                 | 221 |
| y_1  | ELIEMKNGARHKIDLGILSDSQEKTFFDNISHIDIYMK                                                  | 221 |
| y_7  | ELIEMKNGARHKIDLGILSDSQEKTFFDNISHIDIYMK                                                  | 221 |
| y_6  | ELIEMKNGARHKIDLGILSDSQEKTFFDNISHIDIYMK                                                  | 221 |
| y_3  | ELIEMKNGARHKIDLGILSDSQEKTFFDNISHIDIYMK                                                  | 221 |
| y_4  | ELIEMKNGARHKIDLGILSDSQEKTFFDNISHIDIYMK<br>***.*****:*****                               | 221 |

## SEZ

|     |                                                                                 |     |
|-----|---------------------------------------------------------------------------------|-----|
| z_5 | MRKVFILITLLFGYSSYSLLQAKAETQNDPNISELNKSSQYTGSWHNIWYLYNSDPVNAK                    | 60  |
| z_3 | MRKVFILITLLFGYSSYSLLQAKAETQNDPNISELNKSSQYTGSWHNIWYLYNSDPVNAK                    | 60  |
| z_1 | MRKVFILITLLFGYSSYSLLQAKAETQNDPNISELNKSSQYTGSWHNIWYLYNSDPVNAK                    | 60  |
| z_2 | MRKVFILITLLFGYSSYSLLQAKAETQNDPNISELNKSSQYTGSWHNIWYLYNSDPVNAK<br>***:*****:***** | 60  |
| z_5 | KIKLSDKFLSHDFIVPINNPGHYDYVKTELKDSTMASSFDGKEVDIFGVNYFDQCYFSNE                    | 120 |
| z_3 | KIKLSDKFLSHDFIVPINNPGHYDYVKTELKDSTMASSFDGKEVDIFGVNYFDQCYFSNE                    | 120 |
| z_1 | KIKLSDKFLSHDFIVPINNPGHYDYVKTELKDSTMASSFDGKEVDIFGVNYFDQCYFSNE                    | 120 |
| z_2 | KIKLSDKFLSHDFIVPINNPGHYDYVKTELKDSTMASSFDGKEVDIFGVNYFDQCYFSNE<br>*****.*****     | 120 |
| z_5 | NIQCDSNQGAGSKKTCMYGGITLNNNTNNRIQPIVVKVYENDSVTLSDINIDKETVTI                      | 180 |
| z_3 | NIQCDSNQGAGSKKTCMYGGITLNNNTNNRIQPIVVKVYENDSVTLSDINIDKETVTI                      | 180 |
| z_1 | NIQCDSNQGAGSKKTCMYGGITLNNNTNNRIQPIVVKVYENDSVTLSDINIDKETVTI                      | 180 |
| z_2 | NIQCDSNQGAGSKKTCMYGGITLNNNTNNRIQPIVVKVYENDSVTLSDINIDKETVTI<br>*****.*****       | 180 |
| z_5 | QELDYKVRNKLISKINLYHLGGTSYETGYIKFIENGNRYYWYDMMPDPGFTQSKYLMYIR                    | 240 |
| z_3 | QELDYKVRNKLISKINLYHLGGTSYETGYIKFIENGNRYYWYDMMPDPGFTQSKYLMYIR                    | 240 |
| z_1 | QELDYKVRNKLISKINLYHLGGTSYETGYIKFIENGNRYYWYDMMPDPGFTQSKYLMYIR                    | 240 |
| z_2 | QELDYKVRNKLISKINLYHLGGTSYETGYIKFIENGNRYYWYDMMPDPGFTQSKYLMYIR<br>*****           | 240 |

|     |                     |     |
|-----|---------------------|-----|
| z_5 | GNETVESAKTEIEVHLTKK | 259 |
| z_3 | GNETVESAKTEIEVHLTKK | 259 |
| z_1 | GNETVESAKTEIEVHLTKK | 259 |
| z_2 | GNETVESAKTEIEVHLTKK | 259 |
|     | *****               |     |

# TSST1

|         |                                                               |     |
|---------|---------------------------------------------------------------|-----|
| TSST1_6 | MNKKLLMNFFIVSPLLLATIATDFTVPVPLSSNQIIKTAKASTNDNIKDLLDWYSSGSDTF | 60  |
| TSST1_1 | MNKKLLMNFFIVSPLLLATIATDFTVPVPLSSNQIIKTAKASTNDNIKDLLDWYSSGSDTF | 60  |
| TSST1_3 | MNKKLLMNFFIVSPLLLATIATDFTVPVPLSSNQIIKTAKASTNDNIKDLLDWYSSGSDTF | 60  |
| TSST1_5 | MNKKLLMKFFIVSPLLLATIATGFTVPVPLSSNQIIKTAKASTNDNIKDLLDWYSSGSDAF | 60  |
| TSST1_2 | MNKKLLMKFFIVSPLLLATIATGFTVPVPLSSNQIIKTAKASTNDNIKDLLDWYSSGSDAF | 60  |
| TSST1_4 | MNKKLLMKFFIVSPLLLATIATGFTVPVPLSSNQIIKTAKASTNDNIKDLLDWYSSGSDAF | 60  |
|         | *****:*****.***** ***** *****:*                               |     |
| TSST1_6 | TNSEVLDNSLGSMRIKNTDGSISLIIFPSPYYSPAFTKGGKVDLNTKRTKKSQHTSEGTY  | 120 |
| TSST1_1 | TNSEVLDNSLGSMRIKNTDGSISLIIFPSPYYSPAFTKGEKVDLNTKRTKKSQHTSEGTY  | 120 |
| TSST1_3 | TNSEVLDNSLGSMRIKNTDGSISLIIFPSPYYSPAFTKGEKVDLNTKRTKKSQHTSEGTY  | 120 |
| TSST1_5 | TNSEVLDNSLGSMRIKNTDGSISLIIFPSPYYSPFTFSKGEKVDLNTKRTKKSQHTSEGTW | 120 |
| TSST1_2 | TNSEVLDNSLGSMRIKNTDGSISLIIFPSPYYSPFTFSKGEKVDLNTKRIKKSQHTSEGTW | 120 |
| TSST1_4 | TNSEVLDNSLGSMRIKNTDGSISLIIFPSPYYSPFTFSKGEKVDLNTKRIKKSQHTSEGTW | 120 |
|         | *****:*****:*** ***** *****:                                  |     |
| TSST1_6 | IHFQISGVTNTEKLPTPIELPLKVKVHGKDSPLKYWPKFDDKKQLAISTLDFEIRHQLTQI | 180 |
| TSST1_1 | IHFQISGVTNTEKLPTPIELPLKVKVHGKDSPLKYWPKFDDKKQLAISTLDFEIRHQLTQI | 180 |
| TSST1_3 | IHFQISGVTNTEKLPTPIELPLKVKVHGKDSPLKYWPKFDDKKQLAISTLDFEIRHQLTQI | 180 |
| TSST1_5 | IHFQISGVTNTEKLPTPIELPLKVKVHGKDSPLKYWPKFDDKKQLAISTLDFEIRHQLTQI | 180 |
| TSST1_2 | IHFQISGVTNTEKLPTPIELPLKVKVHGKDSPLKYWPKFDDKKQLAISTLDFKIRHQLTQT | 180 |
| TSST1_4 | IHFQISGVTNTEKLPTPIELPLKVKVHGKNSPLKYWPKFDDKKQLAISTLDFKIRHQLTQT | 180 |
|         | *****:*****:*****                                             |     |
| TSST1_6 | HGLYRSDKTGGYWKITMNDGSTYQSDLSKKFEYNTEKPPINIDEIKTIEAEIN         | 234 |
| TSST1_1 | HGLYRSDKTGGYWKITMNDGSTYQSDLSKKFEYNTEKPPINIDEIKTIEAEIN         | 234 |
| TSST1_3 | HGLYRSDKTGGYWKITMNDGSTYQSDLSKKFEYNTEKPPINIDEIKTIEAEIN         | 234 |
| TSST1_5 | HGLYRSDKTGGYWKITMNDGSTYQSDLSKKFEYNTEKPPINIDEIKTIEAEIN         | 234 |
| TSST1_2 | HGLYRSDKTGGYWKITMNDGSTYQSDLSKKFEYNTEKPPINIDEIKTIEAEIN         | 234 |
| TSST1_4 | HGLYRSDKTGGYWKITMNDGSTYQSDLSKKFEYNTEKPPINIDEIKTIEAEIN         | 234 |
|         | *****                                                         |     |
